# Supplementary material for: Whole-brain mapping of histaminergic projections in mouse brain
Source: PubMed Central journal article supplement — Proc Natl Acad Sci U S A. 2023 Mar 28;120(14):e2216231120. doi: 10.1073/pnas.2216231120 (PMC10083611; doi:10.1073/pnas.2216231120), 2023-03-28
Supplement: pnas.2216231120.sapp.pdf [file pnas.2216231120.sapp.pdf]

## Supporting Information for Whole-Brain Mapping of Histaminergic Projections in Mouse Brain

Wenkai Lin<sup>1,2,9</sup>, Lingyu Xu<sup>1,9</sup>, Yanrong Zheng<sup>2</sup>, Sile An<sup>3</sup>, Mengting Zhao<sup>3</sup>, Weiwei Hu<sup>1</sup>, Mengyao Li<sup>5</sup>, Hui Dong<sup>5</sup>, Anan Li<sup>4</sup>, Yulong Li<sup>5</sup>, Hui Gong<sup>4</sup>, Gang Pan<sup>6</sup>, Yi Wang<sup>1,2,7</sup>, Qingming Luo<sup>8</sup> and Zhong Chen<sup>1,2,7,\*</sup>

<sup>1</sup>Institute of Pharmacology & Toxicology, Key Laboratory of Medical Neurobiology of the Ministry of Health of China, College of Pharmaceutical Sciences, Zhejiang University, Hangzhou, China; 310058

<sup>2</sup>Key Laboratory of Neuropharmacology and Translational Medicine of Zhejiang Province, School of Pharmaceutical Sciences, Zhejiang Chinese Medical University, Hangzhou, China; 310053

<sup>3</sup>Britton Chance Center for Biomedical Photonics, Wuhan National Laboratory for Optoelectronics, MoE Key Laboratory for Biomedical Photonics, Huazhong University of Science and Technology, Wuhan, China; 430074

<sup>4</sup>HUST-Suzhou Institute for Brainsmatics, JITRI Institute for Brainsmatics, Suzhou, China; 215000

<sup>5</sup>State Key Laboratory of Membrane Biology, Peking University School of Life Sciences, Beijing, China; 100871

<sup>6</sup>Department of Computer Science, Zhejiang University, Hangzhou, China; 310058

<sup>7</sup>Epilepsy Center, Department of Neurology, Second Affiliated Hospital, School of Medicine, Zhejiang University, Hangzhou, China; 310009

<sup>8</sup>Key Laboratory of Biomedical Engineering of Hainan Province, School of Biomedical Engineering, Hainan University, Haikou, China; 570228

<sup>9</sup>These authors contributed equally to this paper.

\* Corresponding author: Prof. Zhong Chen, Ph.D.

**Email:** [chenzhong@zju.edu.cn](mailto:chenzhong@zju.edu.cn)

### This PDF file includes:

- Supplementary materials and methods
- Figures S1 to S7
- Legends for Movies S1 to S2
- Table S1 to S4
- SI References

## Supplementary materials and methods

### Viruses

AAV-Ef1 $\alpha$ -DIO-GCaMP6s-eYFP (viral titers:  $5.0 \times 10^{12}$  particles/mL), AAV-Ef1 $\alpha$ -DIO-hChr2(H134R)-eYFP (viral titers:  $1.6 \times 10^{13}$  particles/mL), and AAV-CAG-FLEX-ArchT-GFP (viral titers:  $1.3 \times 10^{12}$  particles/mL) were purchased from OBio Biotech Co., Ltd (Shanghai, China). AAV-hSyn-DIO-ChrimsonR-mCherry (viral titers:  $2.57 \times 10^{12}$  particles/mL), rAAV-EF1 $\alpha$ -DIO-jRGECO1 $\alpha$  (viral titers:  $5.0 \times 10^{12}$  particles/mL), rAAV-EF1 $\alpha$ -DIO-flp-WPRE-hGH pA (viral titers:  $5.0 \times 10^{12}$  particles/mL) and rAAV-nEF1 $\alpha$ -fDIO-eYFP-eYFP-WPRE-hGH pA (viral titers:  $5.0 \times 10^{12}$  particles/mL) were purchased from BrainVTA Co., Ltd (Wuhan, China). AAV2/2Retro-hEF1 $\alpha$ -DIO-mCherry (viral titers:  $5.0 \times 10^{12}$  particles/mL) and AAV2/2Retro-hEF1 $\alpha$ -DIO-eYFP (viral titers:  $5.0 \times 10^{12}$  particles/mL) were purchased from Taitool Bioscience (Shanghai, China). AAV9-hSyn-GRABHA1m (viral titers:  $3.8 \times 10^{13}$  particles/mL) and AAV9-hSyn-GRABHAMutant (viral titers:  $9.03 \times 10^{13}$  particles/mL) were produced by Prof. Yulong Li, Peking University (Beijing, China). All viral vectors were aliquoted and stored at  $-80^\circ\text{C}$  until use.

### Stereotactic injections

Mice were anesthetized with 1% sodium pentobarbital (50 mg/kg, i.p., Sigma-Aldrich) and head-fixed in a stereotaxic apparatus (512600, Stoelting, USA). During the entire operation, the body temperature of the anesthetized mice was kept constant at  $37^\circ\text{C}$  using a heating pad. If the mice had a pain reflex response from a paw pinch, an additional 10% of the initial dose of sodium pentobarbital was given to guarantee a painless state. An incision was made in mice's heads to expose the skull surface. After scraping the pericranium away, burr holes were stereotactically made onto the skulls. For histaminergic fiber labeling, 300 nL of AAV-CAG-FLEX-ArchT-GFP was injected into each side of the TMN (bregma 2.0 mm, lateral 0.8 mm, depth 5.4 mm from skull surface) of HDC-CreERT2 adult mice. One day after virus injection, mice received tamoxifen injection (100 mg/kg/d, i.p.) for 5 consecutive days. Four weeks later, fMOST experiments were performed.

For functional testing, 300 nL of AAV-hSyn-DIO-ChrimsonR-mCherry or rAAV-EF1 $\alpha$ -DIO-jRGECO1 $\alpha$  was injected into the right TMN (bregma 2.0 mm, lateral 0.8 mm, depth 5.4 mm from skull surface) of HDC-CreERT2 adult mice, and 200 nL of AAV-hSyn-HA1m was injected into the MS (bregma -1.2 mm, lateral 0.0 mm, depth 4.6 mm from skull surface), right CeA (bregma 0.8 mm, lateral 2.2 mm, depth 4.8 mm from skull surface), and right CA3 (bregma 3.1 mm, lateral 3.3 mm, depth 3.2 mm from skull surface) at the simultaneously. One day after virus injection, mice received tamoxifen injection (100 mg/kg/d, i.p.) for 5 consecutive days. Three weeks later, stereotactic surgery was performed, and the mice received functional tests 1 week after surgery.

For retrograde tracing, 300 nL of AAV2/2Retro-hEF1 $\alpha$ -DIO-mCherry was injected into the MS (bregma -1.2 mm, lateral 0.0 mm, depth 4.6 mm from skull surface), and 300 nL of AAV2/2Retro-hEF1 $\alpha$ -DIO-eYFP was injected into the SC (bregma 3.5 mm, lateral 0.0 mm, depth 2.0 mm from skull surface) or bilateral Alp (bregma 0.2 mm, lateral 3.5 mm, depth 4.1 mm from skull surface)

For histaminergic neuron sparse labeling, 300 nL of rAAV-EF1 $\alpha$ -DIO-flp-WPRE-hGH pA (final dilution ratio: 1:40000) and rAAV-nEF1 $\alpha$ -fDIO-eYFP-eYFP-WPRE-hGH pA mixed virus was injected into the bilateral TMN (bregma 2.0 mm, lateral  $\pm 0.8$  mm, depth 5.4 mm from skull surface) of HDC-CreERT2 adult mice. One day after virus injection, mice received tamoxifen injection (100 mg/kg/d, i.p.) for 5 consecutive days. Four weeks later, fMOST experiments were performed.

### Stereotactic surgery

For functional testing, stereotactic surgery was performed 3 weeks after virus injection and tamoxifen administration. The procedure up through boring the burr holes was the same as the stereotactic injections; at which point optic fibers were concurrently and separately implanted into different brain regions of the same mouse: right TMN (bregma 2.0 mm, lateral 0.8 mm, depth 5.0 mm from skull surface), MS (bregma -1.2 mm, lateral 0.0 mm, depth 4.0 mm from skull surface), right CeA (bregma 0.8 mm, lateral 3.2 mm from skull surface, depth 4.6 mm tilt  $10^\circ$  from skull surface at position of burr hole), and right CA3 (bregma 3.1 mm, lateral 3.3 mm, depth 2.9 mm from skull surface). Functional test experiments started 1 week after implantation surgery.

### **fMOST tissue preparation**

All histological procedures were performed as has been described in a previous study(1). Mice were anesthetized and perfused with 0.01 M PBS and PBS containing 4% paraformaldehyde (PFA), respectively. Brains were post-fixed in 4% PFA for 24 hrs. Fixed brains were transferred into 0.01 M PBS and incubated at 4 °C overnight, then dehydrated in graded ethanol solutions. Individual brains were then impregnated with Glycol Methacrylate (GMA, Ted Pella Inc.) and embedded in a vacuum oven.

### **Whole-brain imaging**

The whole-brain imaging procedure is based on a Brain-wide Position System (BPS)(1), with simultaneous propidium iodide (PI) staining to label the cytoarchitectonic landmarks and a brain-wide fluorescence micro-optical sectioning tomography (fMOST) via structured illumination. For whole-brain imaging, each sample was immobilized in a water bath on a 3D nano-precision translation stage. The brain samples were then sectioned coronally at an interval of 2 mm in an antero-posterior (AP) direction to achieve the axial scan, counterstained in PI, and then underwent fluorescence image acquisition via mosaic scan. The combination of mosaic x-y-scan and axial z-scan produced a continuous dataset at a voxel resolution of  $0.32 \times 0.32 \times 2 \mu\text{m}^3$ , enabling 3D reconstruction (Movie S2). For individual mouse brains, ~5000 coronal slices were sectioned with an original data size of 1 TB.

### **Image pre-processing**

The raw data acquired by the BPS necessitated mosaic stitching and illumination correction image pre-processing. Briefly, the mosaics of each coronal section were stitched to obtain an entire section based on accurate spatial orientation and adjacent overlaps. Lateral illumination correction was performed section by section. Image pre-processing results were implemented in C++ and optimized in parallel using the Intel MPI Library (v.3.2.2.006, Intel). The whole data sets were executed on a computing server (72 cores, 2 GHz per core) within 6 hrs.

### **Visualization and reconstruction**

We visualized the data set using Amira software (v.5.2.2, FEI) to generate figures and videos. The data set acquired by the dual-color precise imaging system was separated into the GFP channel and PI channel. For whole-brain projection reconstruction, the GFP-labeled data set was sampled at  $3.2 \times 3.2 \times 50 \mu\text{m}^3$  and imported into Amira to generate the 3D image of the histaminergic nerve fibers in the whole-brain. For GFP-labeled neuron reconstruction, the GFP-labeled data set of the posterior hypothalamus was sampled at  $1 \times 1 \times 2 \mu\text{m}^3$  and imported into Amira to generate the 3D image of the local histaminergic neurons.

### **Immunohistochemistry**

Mice were anesthetized with 1% sodium pentobarbital (50 mg/kg, i.p., Sigma-Aldrich) and intracardially perfused with saline, followed by cold 4% paraformaldehyde in 0.01 M phosphate buffer (PBS). The brain was then removed, postfixed in 4% paraformaldehyde at 4 °C for 4 hrs, and then equilibrated in 30% sucrose in 0.01 M PBS at 4 °C for at least 36 hrs. Coronal sections (50  $\mu\text{m}$ ) were cut on a freezing microtome (Thermo NX50). After three rinses with 0.1 M PBS for 10 min, permeabilization with 300  $\mu\text{L}$  of 1 % Triton X-100 (vol/vol) in 0.1 M PBS for 15 min, and blocking with 300  $\mu\text{L}$  of 5% (wt/vol) normal bovine serum for 2 hrs at room temperature, the sections were incubated with the primary antibodies diluted in 300  $\mu\text{L}$  of PBS with 5% normal bovine serum overnight at 4 °C: Rabbit Polyclonal HDC (America Research Products, 03-16045, 1:300). After three rinses with 0.1 M PBS for 10 min, the sections were incubated with Alexa-594-conjugated donkey anti-rabbit secondary fluorescent antibodies (Jackson ImmunoResearch, 711-585-152) for 2 hrs at room temperature. After rinsing, the sections were mounted on slides using Vectashield Mounting Media (Vector Labs) and confocal images were taken (Olympus FV-1000).

### **Statistics**

All statistical graphs were generated using Graphpad Prism v.6.01. All data are presented as means  $\pm$  s.e.m. Number of experimental replicates (n) is indicated in the figure legends and refers

to the number of experimental subjects independently treated in each experimental condition. P values  $< 0.05$  were considered to be statistically significant.

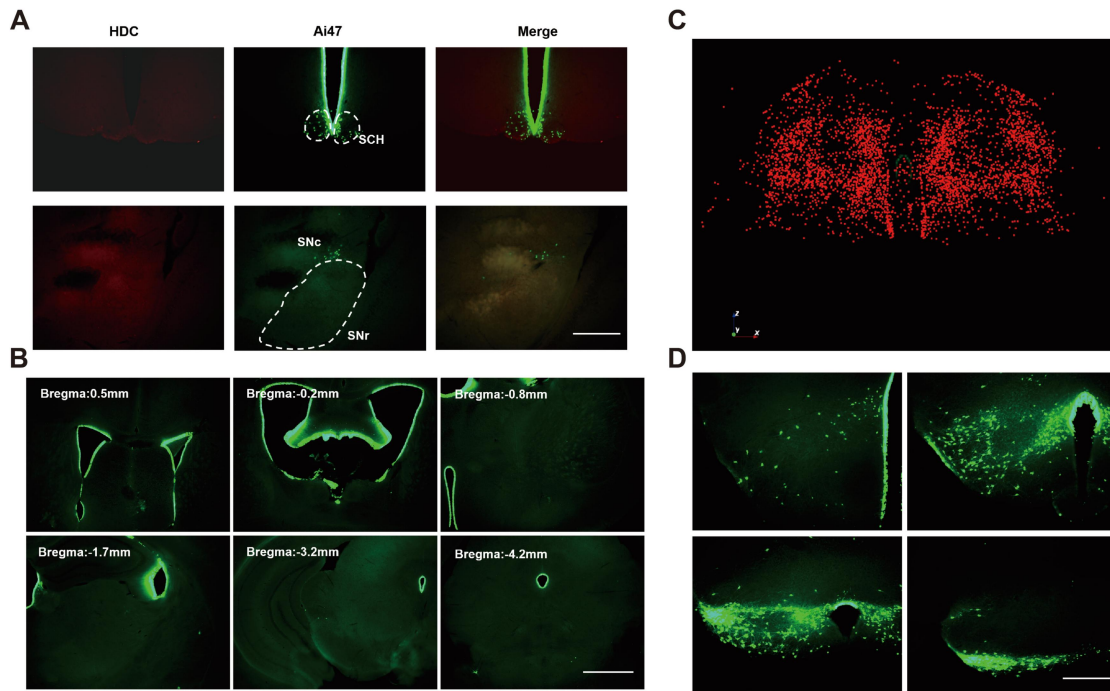

**Fig. S1.** Characteristics of the HDC-CreERT2: Ai47 mice. (A) Immunohistochemical analysis of GFP expression outside the posterior hypothalamus in the HDC-CreERT2: Ai47 mouse brain. Scale bars, 400 $\mu$ m. (B) Several coronal sections showing extremely bright fluorescent signal at the edge of the ventricles in the HDC-CreERT2: Ai47 mouse brain. Scale bars, 1mm. (C) The somata of GFP-labeled neurons were extracted by NeuroGPS software. (D) GFP labeled somata and fibers of histaminergic neurons in the posterior hypothalamus of the HDC-CreERT2: Ai47 mouse killed 6 months after tamoxifen administration. Scale bars, 400  $\mu$ m. SCH, Suprachiasmatic nucleus; SNc, Substantia nigra, compact part; SNr, Substantia nigra, reticular part.

A

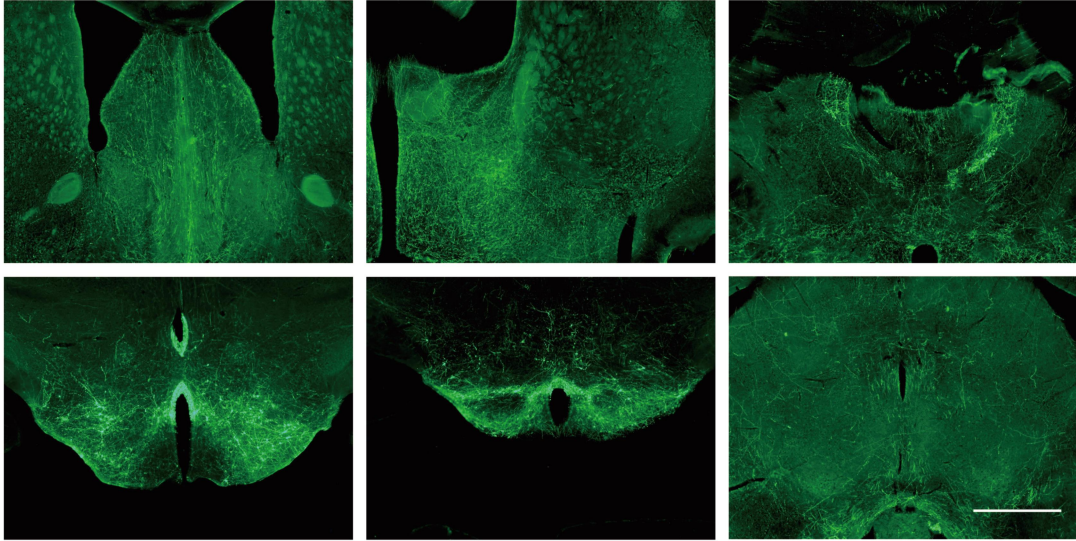

B

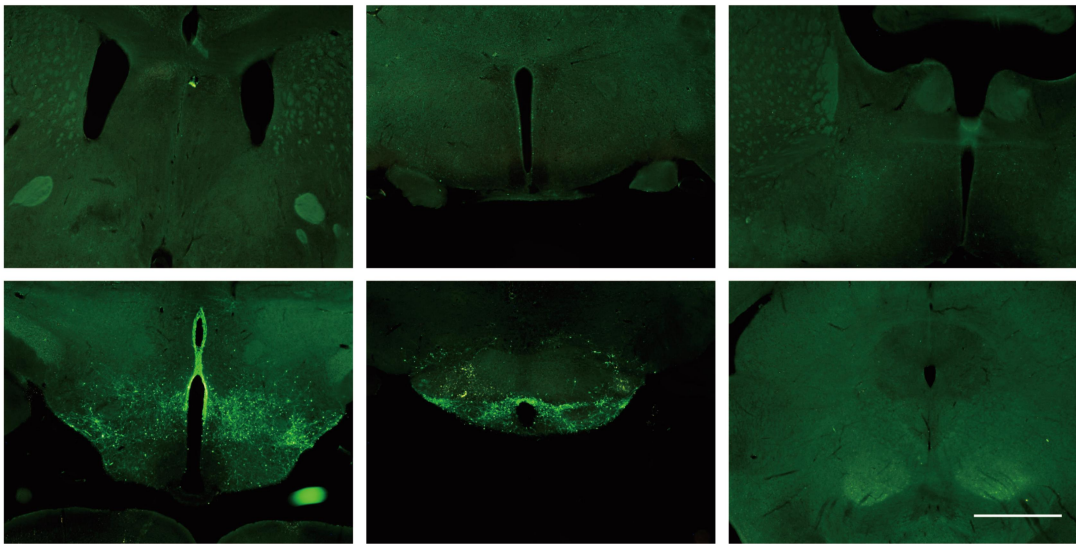

C

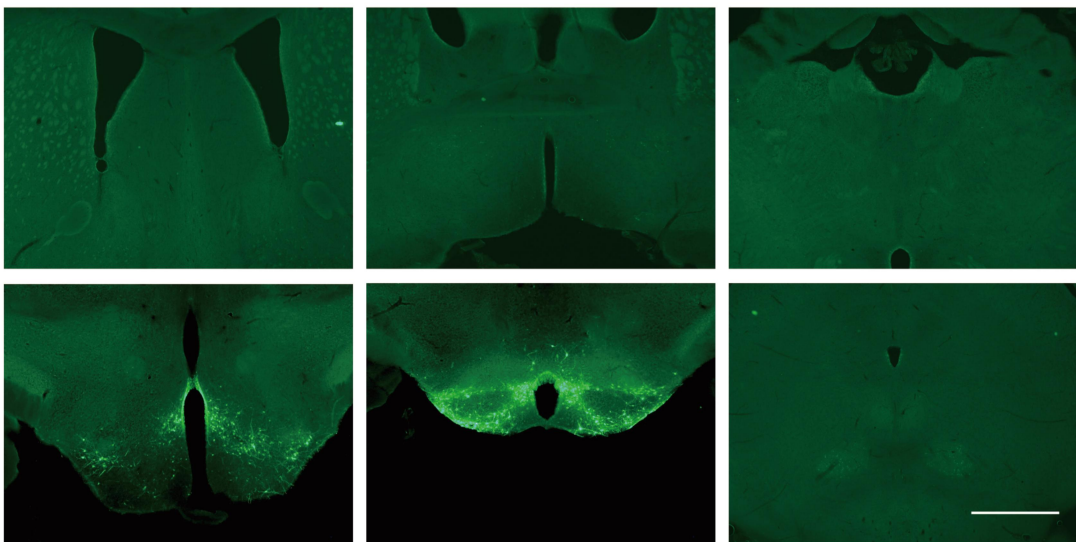

**Fig. S2.** Characteristics of the virus labeled mice. (A-C) Representative coronal sections showing virus labeled histaminergic somata or fibers in different brain regions of HDC-Arch-GFP<sup>TMN</sup> (A), HDC-ChR2-eYFP<sup>TMN</sup> (B), and HDC-GCaMP6s<sup>TMN</sup> (C) mice. Scale bars are 1mm in a, b and c.

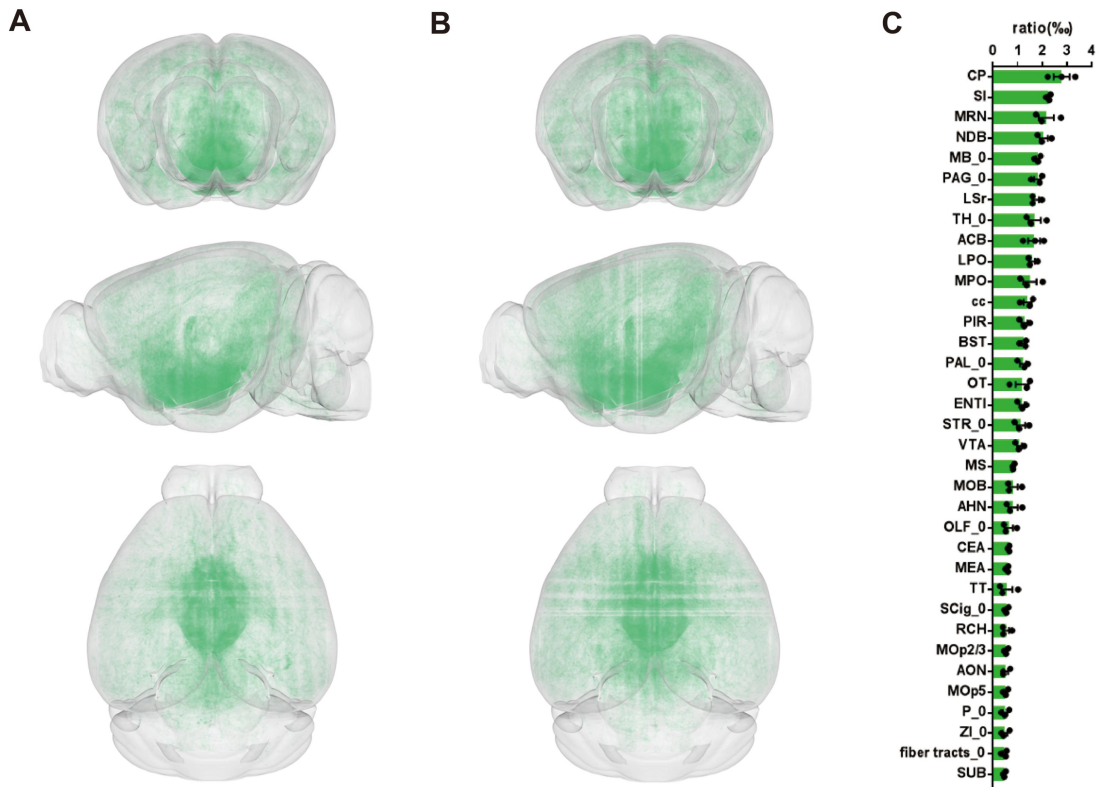

**Fig S3.** Whole brain standard visualization of HDC-Arch-GFP<sup>TMN</sup> mice. (A, B) Visualization of fluorescent labeled information of registered HDC-Arch-GFP<sup>TMN</sup> mouse brains, sample 193973 (A) and 193974 (B). (C) Proportion of fluorescent pixels of 35 brain regions with the most total fluorescent pixels in the whole mouse brain of three samples. See the abbreviations of in Table S1. All data are presented as mean ± s.e.m..



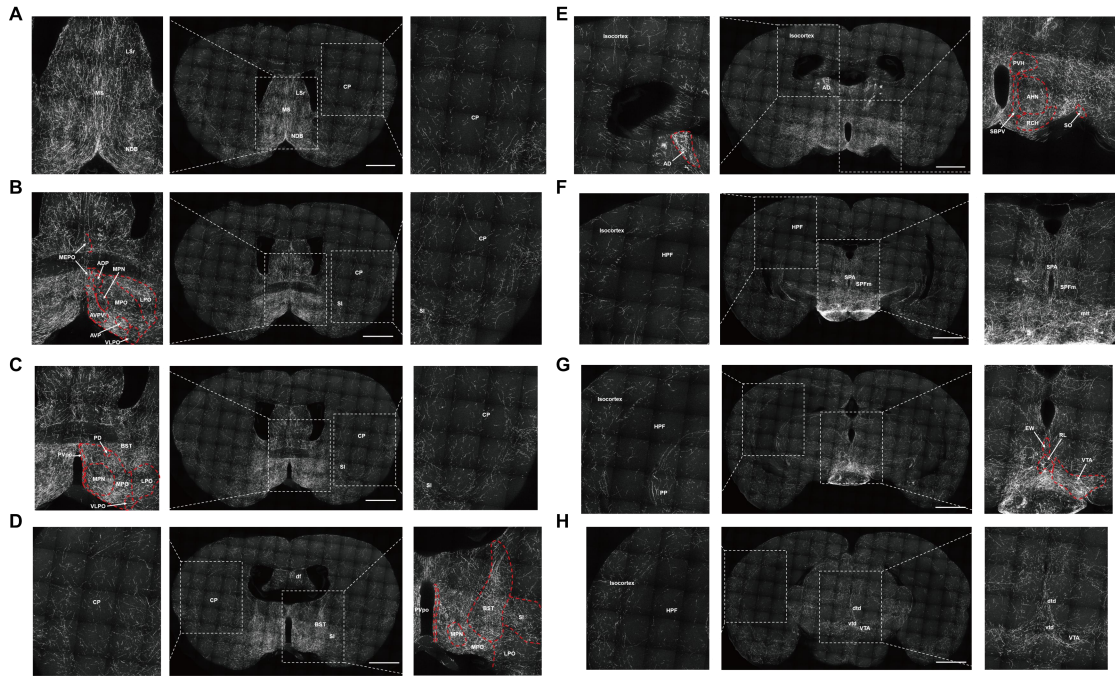

**Fig S4.** Raw data of histaminergic fiber distribution. (A-H) Several coronal brain slices show the histaminergic fiber distribution 1.0mm (A) 0.2mm (B) 0.0mm (C) -0.2mm (D) -0.7mm (E) -2.3mm (F) -3.2mm (G) -3.8mm (H) from bregma. Scale bar: 1mm. See the abbreviations in Table S1.

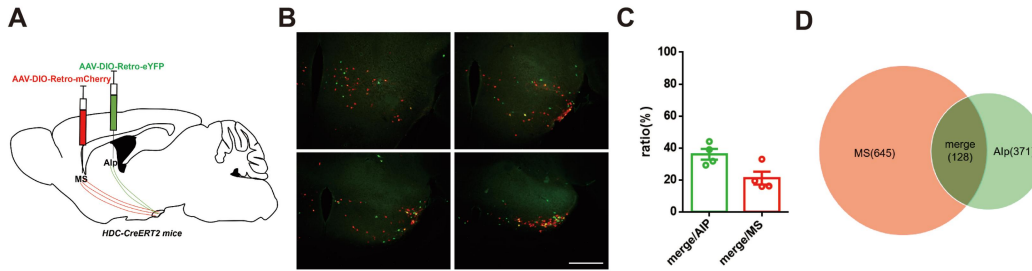

**Fig S5.** Retrograde tracing of MS- and Alp-projecting histaminergic neurons in HDC-CreERT2 mice. (A) Experimental scheme for generating HDC-Retro-mCherry<sup>MS</sup>-Retro-GFP<sup>Alp</sup> mice. AAV-DIO-Retro-mCherry was injected into the MS of HDC-CreERT2 mice, and AAV-DIO-Retro-GFP was injected into the bilateral Alp simultaneously. (B) Representative coronal sections showing Retro virus labeled histaminergic somata in an HDC-Retro-mCherry<sup>MS</sup>-Retro-GFP<sup>Alp</sup> mouse with several distance from bregma. scale bar: 400 $\mu$ m. (C) Co-label ratio of GFP and mCherry labeled somata of 4 HDC-Retro-mCherry<sup>MS</sup>-Retro-GFP<sup>Alp</sup> mice. (D) Venn diagram shows the number of all GFP and mCherry labeled somata of 4 HDC-Retro-mCherry<sup>MS</sup>-Retro-GFP<sup>Alp</sup> mice.

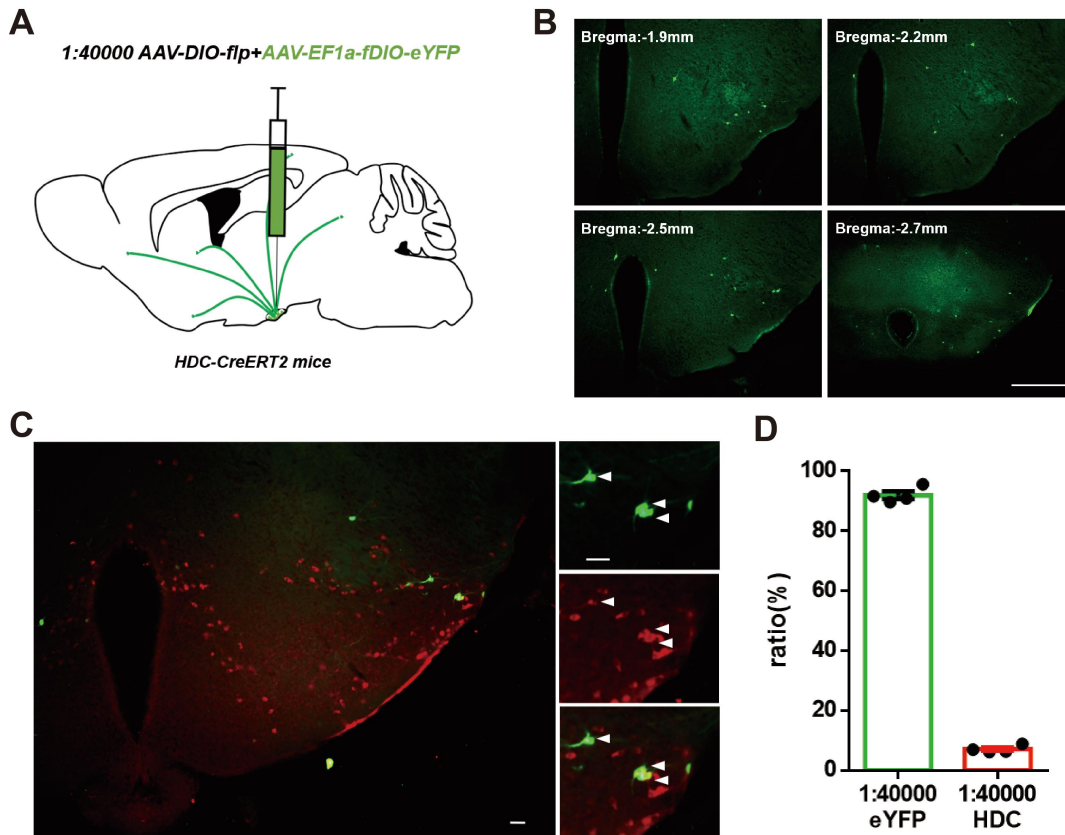

**Fig S6.** Sparse labeling of histaminergic neurons in HDC-CreERT2 mice. (A) Experimental scheme for generation of HDC-DIO-flp+fDIO-eYFP<sup>TMN</sup> mice. rAAV-EF1 $\alpha$ -DIO-flp-WPRE-hGH was diluted by PBS and mixed with rAAV-EF1 $\alpha$ -DIO-flp-WPRE-hGH before injected into the right TMN of HDC-CreERT2 mice. (B) Representative images of the TMN followed by 1:40000 diluted virus injection. (C) Representative immunohistochemical pictures of expression specificity in HDC-DIO-flp+fDIO-eYFP<sup>TMN</sup> mice, 1:40000 diluted; eYFP, and HDC double-positive neurons are indicated by arrowheads. scale bar: 50 $\mu$ m. (D) Expression specificity analysis of eYFP in HDC-DIO-flp+fDIO-eYFP<sup>TMN</sup> mice.

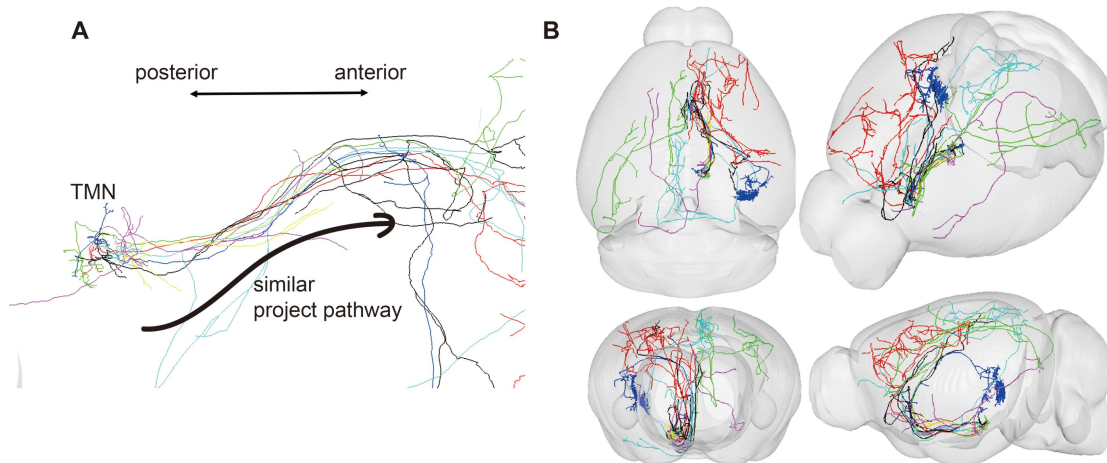

**Fig S7.** Whole brain fiber distribution of 7 neurons who have similar project pathway when depart from TMN. (A) Horizontal view of 7 histaminergic neuron fiber project pathway launching from TMN. Every single color indicates a sole histaminergic neuron. (B) 3D views of 7 fully reconstructed histaminergic neurons who have similar project pathway near their original location.

**Movie S1.** The location of histaminergic neuron somata from anterior to posterior TMN in one of the tested mice.

**Movie S2.** The 3D fluorescent raw data of whole-brain histaminergic neural circuits from one of the tested mice.

Table S1. Fluorescence density raw data of HDC-Arch-GFP<sup>TMN</sup> mice.

| Region                                               | Abbreviation | Fluorescent labeled pixels |             |             | Brain region pixels | Fluorescence density value |        |        |         |
|------------------------------------------------------|--------------|----------------------------|-------------|-------------|---------------------|----------------------------|--------|--------|---------|
|                                                      |              | 192979                     | 193973      | 193974      |                     | 192979                     | 193973 | 193974 | average |
| Lateral mammillary nucleus                           | LM           | 114595                     | 172722      | 149756      | 4097500             | 2.80%                      | 4.22%  | 3.65%  | 3.56%   |
| Tuberomammillary nucleus, dorsal part                | TMd          | 72803                      | 9130        | 80128       | 1866250             | 3.90%                      | 0.49%  | 4.29%  | 2.89%   |
| Dorsal premammillary nucleus                         | PMd          | 469539                     | 219614      | 161965      | 10592250            | 4.43%                      | 2.07%  | 1.53%  | 2.68%   |
| Ventral premammillary nucleus                        | PMv          | 529557                     | 180497      | 168055      | 10957250            | 4.83%                      | 1.65%  | 1.53%  | 2.67%   |
| Tuberal nucleus                                      | TU           | 189951<br>3                | 122961<br>9 | 134659<br>7 | 58963250            | 3.22%                      | 2.09%  | 2.28%  | 2.53%   |
| Tuberomammillary nucleus, ventral part               | TMv          | 89249                      | 54095       | 77600       | 3688000             | 2.42%                      | 1.47%  | 2.10%  | 2.00%   |
| principal mammillary tract                           | pm           | 3115                       | 2243        | 1490        | 117750              | 2.65%                      | 1.90%  | 1.27%  | 1.94%   |
| Supramammillary nucleus                              | SUM          | 580769                     | 436926      | 409892      | 25251750            | 2.30%                      | 1.73%  | 1.62%  | 1.88%   |
| supramammillary decussation                          | smd          | 45539                      | 34744       | 27981       | 1958500             | 2.33%                      | 1.77%  | 1.43%  | 1.84%   |
| Parasubthalamic nucleus                              | PSTN         | 139134                     | 145974      | 123344      | 7747750             | 1.80%                      | 1.88%  | 1.59%  | 1.76%   |
| Medial mammillary nucleus                            | MM           | 171497<br>4                | 102157<br>2 | 745646      | 69972500            | 2.45%                      | 1.46%  | 1.07%  | 1.66%   |
| Anteroventral preoptic nucleus                       | AVP          | 182298                     | 135992      | 74663       | 8281250             | 2.20%                      | 1.64%  | 0.90%  | 1.58%   |
| mammillothalamic tract                               | mtt          | 286790                     | 289305      | 278954      | 20516250            | 1.40%                      | 1.41%  | 1.36%  | 1.39%   |
| Lateral hypothalamic area                            | LHA          | 734285<br>4                | 483284<br>2 | 474850<br>6 | 425986000           | 1.72%                      | 1.13%  | 1.11%  | 1.32%   |
| Parastrial nucleus                                   | PS           | 51620                      | 47664       | 29579       | 3368750             | 1.53%                      | 1.41%  | 0.88%  | 1.28%   |
| Retrochiasmatic area                                 | RCH          | 470244                     | 424995      | 276763      | 32213000            | 1.46%                      | 1.32%  | 0.86%  | 1.21%   |
| Anterodorsal nucleus                                 | AD           | 171158                     | 283575      | 260377      | 19736500            | 0.87%                      | 1.44%  | 1.32%  | 1.21%   |
| Posterior hypothalamic nucleus                       | PH           | 155720<br>2                | 853653      | 917247      | 92188250            | 1.69%                      | 0.93%  | 0.99%  | 1.20%   |
| Ventrolateral preoptic nucleus                       | VLPO         | 69148                      | 27315       | 40442       | 3823000             | 1.81%                      | 0.71%  | 1.06%  | 1.19%   |
| Diagonal band nucleus                                | NDB          | 217003<br>5                | 976759      | 158460<br>4 | 132305750           | 1.64%                      | 0.74%  | 1.20%  | 1.19%   |
| Preparasubthalamic nucleus                           | PST          | 28112                      | 16389       | 17989       | 1791000             | 1.57%                      | 0.92%  | 1.00%  | 1.16%   |
| Rostral linear nucleus raphe                         | RL           | 25029                      | 9649        | 10233       | 1354750             | 1.85%                      | 0.71%  | 0.76%  | 1.11%   |
| Medial preoptic area                                 | MPO          | 150428<br>1                | 108981<br>9 | 742679      | 103995500           | 1.45%                      | 1.05%  | 0.71%  | 1.07%   |
| Median preoptic nucleus                              | MEPO         | 301201                     | 185705      | 145275      | 20360000            | 1.48%                      | 0.91%  | 0.71%  | 1.04%   |
| undefined part of the Hypothalamus                   | HY_0         | 654195<br>9                | 337594<br>9 | 394185<br>9 | 454192500           | 1.44%                      | 0.74%  | 0.87%  | 1.02%   |
| mammillotegmental tract                              | mtg          | 127238                     | 95557       | 80697       | 10544750            | 1.21%                      | 0.91%  | 0.77%  | 0.96%   |
| Lateral preoptic area                                | LPO          | 164321<br>1                | 979567      | 966174      | 128298750           | 1.28%                      | 0.76%  | 0.75%  | 0.93%   |
| Periventricular hypothalamic nucleus, posterior part | PVp          | 202820                     | 84615       | 182659      | 17140500            | 1.18%                      | 0.49%  | 1.07%  | 0.91%   |
| mammillary peduncle                                  | mp           | 39061                      | 15317       | 17122       | 2693250             | 1.45%                      | 0.57%  | 0.64%  | 0.88%   |
| Supraoptic nucleus                                   | SO           | 107882                     | 32421       | 49460       | 7235750             | 1.49%                      | 0.45%  | 0.68%  | 0.87%   |
| Medial septal nucleus                                | MS           | 885913                     | 476234      | 547125      | 77011000            | 1.15%                      | 0.62%  | 0.71%  | 0.83%   |
| Ventral tegmental area                               | VTA          | 115008<br>9                | 685963      | 609514      | 100225500           | 1.15%                      | 0.68%  | 0.61%  | 0.81%   |
| Interfascicular nucleus raphe                        | IF           | 57285                      | 31281       | 15718       | 4284500             | 1.34%                      | 0.73%  | 0.37%  | 0.81%   |
| Dorsomedial nucleus of the hypothalamus              | DMH          | 695486                     | 275038      | 501993      | 60594250            | 1.15%                      | 0.45%  | 0.83%  | 0.81%   |
| Suprachiasmatic nucleus                              | SCH          | 123117                     | 65252       | 103795      | 12230750            | 1.01%                      | 0.53%  | 0.85%  | 0.80%   |
| Anteroventral periventricular nucleus                | AVPV         | 86327                      | 80911       | 27082       | 8487000             | 1.02%                      | 0.95%  | 0.32%  | 0.76%   |
| Medial preoptic nucleus                              | MPN          | 283708                     | 147680      | 109499      | 25822250            | 1.10%                      | 0.57%  | 0.42%  | 0.70%   |
| Anterodorsal preoptic nucleus                        | ADP          | 46942                      | 24466       | 15514       | 4236750             | 1.11%                      | 0.58%  | 0.37%  | 0.68%   |
| Posterodorsal preoptic nucleus                       | PD           | 2826                       | 3243        | 1567        | 378750              | 0.75%                      | 0.86%  | 0.41%  | 0.67%   |
| Subparaventricular zone                              | SBPV         | 192533                     | 96488       | 81848       | 18552250            | 1.04%                      | 0.52%  | 0.44%  | 0.67%   |
| Ventromedial hypothalamic nucleus                    | VMH          | 606618                     | 269732      | 283956      | 58347000            | 1.04%                      | 0.46%  | 0.49%  | 0.66%   |
| ventral tegmental decussation                        | vtd          | 72909                      | 40526       | 43563       | 8175250             | 0.89%                      | 0.50%  | 0.53%  | 0.64%   |
| Periventricular hypothalamic nucleus, preoptic part  | PVpo         | 96708                      | 59580       | 49038       | 10729500            | 0.90%                      | 0.56%  | 0.46%  | 0.64%   |

|                                                           |       |             |             |             |           |       |       |       |       |
|-----------------------------------------------------------|-------|-------------|-------------|-------------|-----------|-------|-------|-------|-------|
| columns of the fornix                                     | fx    | 343901      | 157088      | 144146      | 33841000  | 1.02% | 0.46% | 0.43% | 0.64% |
| Edinger-Westphal nucleus                                  | EW    | 26814       | 19268       | 30802       | 4167250   | 0.64% | 0.46% | 0.74% | 0.61% |
| Anterior hypothalamic nucleus                             | AHN   | 765759      | 648161      | 381197      | 97836000  | 0.78% | 0.66% | 0.39% | 0.61% |
| dorsal tegmental decussation                              | dtd   | 41503       | 17693       | 35247       | 5255500   | 0.79% | 0.34% | 0.67% | 0.60% |
| dorsal fornix                                             | df    | 65677       | 31202       | 66171       | 9178750   | 0.72% | 0.34% | 0.72% | 0.59% |
| Interpeduncular nucleus                                   | IPN   | 356403      | 323484      | 78775       | 44128000  | 0.81% | 0.73% | 0.18% | 0.57% |
| Periventricular hypothalamic nucleus, intermediate part   | PVi   | 122039      | 54247       | 45750       | 12939750  | 0.94% | 0.42% | 0.35% | 0.57% |
| Paraventricular hypothalamic nucleus                      | PVH   | 303122      | 102899      | 98940       | 31320750  | 0.97% | 0.33% | 0.32% | 0.54% |
| Septohippocampal nucleus                                  | SH    | 49390       | 7559        | 17485       | 4641750   | 1.06% | 0.16% | 0.38% | 0.53% |
| Bed nuclei of the stria terminalis                        | BST   | 147706<br>1 | 718931      | 716116      | 186378250 | 0.79% | 0.39% | 0.38% | 0.52% |
| Lateral septal nucleus, rostral (rostroventral) part      | LSr   | 218189<br>8 | 870878      | 107329<br>7 | 270677000 | 0.81% | 0.32% | 0.40% | 0.51% |
| Subparafascicular area                                    | SPA   | 39272       | 20633       | 40734       | 6615750   | 0.59% | 0.31% | 0.62% | 0.51% |
| Subparafascicular nucleus, magnocellular part             | SPFm  | 68086       | 33795       | 44025       | 9662000   | 0.70% | 0.35% | 0.46% | 0.50% |
| Substantia innominata                                     | SI    | 255836<br>7 | 122881<br>1 | 143865<br>2 | 347916500 | 0.74% | 0.35% | 0.41% | 0.50% |
| Peripeduncular nucleus                                    | PP    | 34303       | 12772       | 33074       | 5386250   | 0.64% | 0.24% | 0.61% | 0.50% |
| Central linear nucleus raphe                              | CLI   | 78295       | 38469       | 37507       | 10554250  | 0.74% | 0.36% | 0.36% | 0.49% |
| Nucleus of reuniens                                       | RE    | 235918      | 194305      | 269792      | 48017750  | 0.49% | 0.40% | 0.56% | 0.49% |
| Arcuate hypothalamic nucleus                              | ARH   | 164307      | 165106      | 106824      | 30670250  | 0.54% | 0.54% | 0.35% | 0.47% |
| Accessory supraoptic group                                | ASO   | 1115        | 1123        | 341         | 186250    | 0.60% | 0.60% | 0.18% | 0.46% |
| undefined part of the Pallidum                            | PAL_0 | 155073<br>5 | 538498      | 850890      | 216882000 | 0.72% | 0.25% | 0.39% | 0.45% |
| Magnocellular nucleus                                     | MA    | 307928      | 117261      | 137383      | 41941750  | 0.73% | 0.28% | 0.33% | 0.45% |
| Anteromedial nucleus                                      | AM    | 250254      | 161713      | 134092      | 41803500  | 0.60% | 0.39% | 0.32% | 0.44% |
| Vascular organ of the lamina terminalis                   | OV    | 9177        | 6882        | 3363        | 1488000   | 0.62% | 0.46% | 0.23% | 0.44% |
| Anteroventral nucleus of thalamus                         | AV    | 233437      | 157870      | 269482      | 50984750  | 0.46% | 0.31% | 0.53% | 0.43% |
| Lateral septal nucleus, ventral part                      | LSv   | 107531      | 42146       | 32799       | 14327750  | 0.75% | 0.29% | 0.23% | 0.42% |
| Perireunensis nucleus                                     | PR    | 12889       | 7482        | 7691        | 2246000   | 0.57% | 0.33% | 0.34% | 0.42% |
| Interanterodorsal nucleus of the thalamus                 | IAD   | 31581       | 46601       | 47821       | 10810750  | 0.29% | 0.43% | 0.44% | 0.39% |
| Paraventricular hypothalamic nucleus, descending division | PVHd  | 37317       | 18642       | 11073       | 5841000   | 0.64% | 0.32% | 0.19% | 0.38% |
| Dorsal nucleus raphe                                      | DR    | 84585       | 43786       | 54007       | 16197500  | 0.52% | 0.27% | 0.33% | 0.38% |
| Rhomboid nucleus                                          | RH    | 27961       | 32201       | 29483       | 7983500   | 0.35% | 0.40% | 0.37% | 0.37% |
| Substantia nigra, compact part                            | SNc   | 150692      | 60292       | 75073       | 26561500  | 0.57% | 0.23% | 0.28% | 0.36% |
| Septofimbrial nucleus                                     | SF    | 165066      | 90035       | 93323       | 32757500  | 0.50% | 0.27% | 0.28% | 0.35% |
| Intermediodorsal nucleus of the thalamus                  | IMD   | 54416       | 61068       | 76646       | 18208250  | 0.30% | 0.34% | 0.42% | 0.35% |
| optic tract                                               | opt   | 482181      | 139357      | 264460      | 84631750  | 0.57% | 0.16% | 0.31% | 0.35% |
| Interstitial nucleus of Cajal                             | INC   | 17336       | 17735       | 34025       | 6848000   | 0.25% | 0.26% | 0.50% | 0.34% |
| Central amygdalar nucleus                                 | CEA   | 737734      | 330560      | 451485      | 153246000 | 0.48% | 0.22% | 0.29% | 0.33% |
| fasciculus retroflexus                                    | fr    | 99911       | 49760       | 60328       | 21508000  | 0.46% | 0.23% | 0.28% | 0.33% |
| Dorsal tegmental nucleus                                  | DTN   | 23704       | 73236       | 9407        | 10897500  | 0.22% | 0.67% | 0.09% | 0.33% |
| Lateral terminal nucleus of the accessory optic tract     | LT    | 2547        | 1138        | 3463        | 732500    | 0.35% | 0.16% | 0.47% | 0.33% |
| Interanteromedial nucleus of the thalamus                 | IAM   | 24295       | 17684       | 15532       | 5997250   | 0.41% | 0.29% | 0.26% | 0.32% |
| Ventral tegmental nucleus                                 | VTN   | 17321       | 23605       | 3939        | 4691250   | 0.37% | 0.50% | 0.08% | 0.32% |
| Paraventricular nucleus of the thalamus                   | PVT   | 265808      | 84191       | 130396      | 50309500  | 0.53% | 0.17% | 0.26% | 0.32% |
| anterior commissure, temporal limb                        | act   | 159359      | 30869       | 53576       | 25610000  | 0.62% | 0.12% | 0.21% | 0.32% |
| Bed nucleus of the anterior commissure                    | BAC   | 3500        | 2796        | 2858        | 983000    | 0.36% | 0.28% | 0.29% | 0.31% |
| Dorsal peduncular area                                    | DP    | 212154      | 21512       | 33614       | 28730750  | 0.74% | 0.07% | 0.12% | 0.31% |
| Subparafascicular nucleus, parvicellular part             | SPFP  | 126286      | 51589       | 120690      | 32814750  | 0.38% | 0.16% | 0.37% | 0.30% |
| Periventricular hypothalamic nucleus, anterior part       | PVa   | 3345        | 5766        | 4381        | 1528500   | 0.22% | 0.38% | 0.29% | 0.29% |

|                                                                         |         |             |             |             |           |       |       |       |       |
|-------------------------------------------------------------------------|---------|-------------|-------------|-------------|-----------|-------|-------|-------|-------|
| Ventral posteromedial nucleus of the thalamus, parvicellular part       | VPMpc   | 36188       | 32375       | 79068       | 16882000  | 0.21% | 0.19% | 0.47% | 0.29% |
| Induseum griseum                                                        | IG      | 13197       | 2711        | 11704       | 3217750   | 0.41% | 0.08% | 0.36% | 0.29% |
| Midbrain reticular nucleus, retrorubral area                            | RR      | 202990      | 88971       | 165356      | 53368000  | 0.38% | 0.17% | 0.31% | 0.29% |
| undefined part of the Striatum                                          | STR_0   | 161609<br>5 | 478079      | 712395      | 340750250 | 0.47% | 0.14% | 0.21% | 0.27% |
| Bed nucleus of the accessory olfactory tract                            | BA      | 45701       | 16621       | 12627       | 9183250   | 0.50% | 0.18% | 0.14% | 0.27% |
| Central medial nucleus of the thalamus                                  | CM      | 62959       | 38973       | 66935       | 20887500  | 0.30% | 0.19% | 0.32% | 0.27% |
| Fields of Forel                                                         | FF      | 12066       | 14378       | 30300       | 7050750   | 0.17% | 0.20% | 0.43% | 0.27% |
| Taenia tecta                                                            | TT      | 112187<br>8 | 162712      | 266776      | 192874750 | 0.58% | 0.08% | 0.14% | 0.27% |
| Nucleus accumbens                                                       | ACB     | 226683<br>2 | 665068      | 114017<br>8 | 514420750 | 0.44% | 0.13% | 0.22% | 0.26% |
| Midbrain reticular nucleus                                              | MRN     | 191375<br>0 | 107146<br>4 | 183772<br>8 | 609975750 | 0.31% | 0.18% | 0.30% | 0.26% |
| Anterior amygdalar area                                                 | AAA     | 286940      | 127116      | 157634      | 72571000  | 0.40% | 0.18% | 0.22% | 0.26% |
| Anterior tegmental nucleus                                              | AT      | 7104        | 3472        | 4785        | 1998750   | 0.36% | 0.17% | 0.24% | 0.26% |
| Subthalamic nucleus                                                     | STN     | 86436       | 44521       | 47919       | 23410500  | 0.37% | 0.19% | 0.20% | 0.25% |
| Precommissural nucleus                                                  | PRC     | 31872       | 17973       | 28518       | 10279250  | 0.31% | 0.17% | 0.28% | 0.25% |
| optic chiasm                                                            | och     | 126713      | 70752       | 68678       | 35597750  | 0.36% | 0.20% | 0.19% | 0.25% |
| Submedial nucleus of the thalamus                                       | SMT     | 41222       | 59473       | 61842       | 21895250  | 0.19% | 0.27% | 0.28% | 0.25% |
| undefined part of the Periaqueductal gray                               | PAG_0   | 169649<br>1 | 107651<br>7 | 126460<br>9 | 553365750 | 0.31% | 0.19% | 0.23% | 0.24% |
| internal medullary lamina of the thalamus                               | im      | 243         | 61          | 1255        | 215000    | 0.11% | 0.03% | 0.58% | 0.24% |
| Posterior amygdalar nucleus                                             | PA      | 153572      | 56442       | 71179       | 39245750  | 0.39% | 0.14% | 0.18% | 0.24% |
| Nucleus of Darkschewitsch                                               | ND      | 7222        | 8992        | 10360       | 3791000   | 0.19% | 0.24% | 0.27% | 0.23% |
| Medial amygdalar nucleus                                                | MEA     | 690835      | 338898      | 341366      | 196364000 | 0.35% | 0.17% | 0.17% | 0.23% |
| Parataenial nucleus                                                     | PT      | 131782      | 49884       | 52857       | 33606750  | 0.39% | 0.15% | 0.16% | 0.23% |
| Superior colliculus, motor related, intermediate gray layer, sublayer a | SCig-a  | 44515       | 26717       | 44295       | 16629750  | 0.27% | 0.16% | 0.27% | 0.23% |
| Nucleus of the brachium of the inferior colliculus                      | NB      | 48874       | 18714       | 52351       | 17376000  | 0.28% | 0.11% | 0.30% | 0.23% |
| Fundus of striatum                                                      | FS      | 171882      | 62202       | 76134       | 45124000  | 0.38% | 0.14% | 0.17% | 0.23% |
| trochlear nerve                                                         | IVn     | 2305        | 2315        | 1218        | 860250    | 0.27% | 0.27% | 0.14% | 0.23% |
| Medial pretectal area                                                   | MPT     | 50010       | 11117       | 32822       | 14181750  | 0.35% | 0.08% | 0.23% | 0.22% |
| Triangular nucleus of septum                                            | TRS     | 74715       | 42929       | 61986       | 27131000  | 0.28% | 0.16% | 0.23% | 0.22% |
| undefined part of the Thalamus                                          | TH_0    | 149335<br>1 | 837769      | 145216<br>7 | 577812250 | 0.26% | 0.14% | 0.25% | 0.22% |
| Infralimbic area, layer 1                                               | ILA1    | 132441      | 27108       | 57207       | 34303500  | 0.39% | 0.08% | 0.17% | 0.21% |
| undefined part of the Zona incerta                                      | ZI_0    | 391244      | 239491      | 457324      | 172333500 | 0.23% | 0.14% | 0.27% | 0.21% |
| Parafascicular nucleus                                                  | PF      | 98667       | 46322       | 176120      | 51191250  | 0.19% | 0.09% | 0.34% | 0.21% |
| Olfactory tubercle                                                      | OT      | 165185<br>2 | 366391      | 915018      | 474655250 | 0.35% | 0.08% | 0.19% | 0.21% |
| Superior colliculus, motor related, intermediate gray layer, sublayer c | SCig-c  | 24798       | 11945       | 23095       | 9793750   | 0.25% | 0.12% | 0.24% | 0.20% |
| Olivary pretectal nucleus                                               | OP      | 25309       | 10232       | 24695       | 9993500   | 0.25% | 0.10% | 0.25% | 0.20% |
| undefined part of the Midbrain                                          | MB_0    | 183903<br>7 | 991375      | 128999<br>4 | 690054750 | 0.27% | 0.14% | 0.19% | 0.20% |
| Ventral medial nucleus of the thalamus                                  | VM      | 115669      | 105241      | 321634      | 92251750  | 0.13% | 0.11% | 0.35% | 0.20% |
| undefined part of the Striatum-like amygdalar nuclei                    | sAMY_0  | 85771       | 42031       | 47360       | 30004250  | 0.29% | 0.14% | 0.16% | 0.19% |
| Nucleus of the posterior commissure                                     | NPC     | 60501       | 49207       | 67123       | 30347750  | 0.20% | 0.16% | 0.22% | 0.19% |
| stria medullaris                                                        | sm      | 124483      | 34626       | 37501       | 33936250  | 0.37% | 0.10% | 0.11% | 0.19% |
| Superior colliculus, optic layer                                        | SCop    | 215300      | 117790      | 131560      | 80516000  | 0.27% | 0.15% | 0.16% | 0.19% |
| Lateral habenula                                                        | LH      | 102727      | 51865       | 75286       | 40144000  | 0.26% | 0.13% | 0.19% | 0.19% |
| Superior colliculus, motor related, intermediate gray layer, sublayer b | SCig-b  | 105474      | 63481       | 121495      | 50921500  | 0.21% | 0.12% | 0.24% | 0.19% |
| Posterolateral visual area, layer 6b                                    | VISpl6b | 211         | 522         | 679         | 251750    | 0.08% | 0.21% | 0.27% | 0.19% |
| Ventral posterolateral nucleus of the thalamus, parvicellular part      | VPLpc   | 6665        | 3514        | 13639       | 4288750   | 0.16% | 0.08% | 0.32% | 0.19% |
| Entorhinal area, medial part, ventral zone                              | ENTmv   | 83301       | 35998       | 53106       | 32317500  | 0.26% | 0.11% | 0.16% | 0.18% |



|                                                                                   |         |        |        |        |           |       |       |       |       |
|-----------------------------------------------------------------------------------|---------|--------|--------|--------|-----------|-------|-------|-------|-------|
| medial lemniscus                                                                  | ml      | 150638 | 90699  | 120684 | 68025750  | 0.22% | 0.13% | 0.18% | 0.18% |
| Intercalated amygdalar nucleus                                                    | IA      | 59059  | 36931  | 32900  | 24312000  | 0.24% | 0.15% | 0.14% | 0.18% |
| Posterior limiting nucleus of the thalamus                                        | POL     | 28837  | 14214  | 26893  | 13361500  | 0.22% | 0.11% | 0.20% | 0.17% |
| posterior commissure                                                              | pc      | 14601  | 7514   | 11410  | 6565000   | 0.22% | 0.11% | 0.17% | 0.17% |
| Visceral area, layer 1                                                            | VISC1   | 74947  | 32359  | 70005  | 34806500  | 0.22% | 0.09% | 0.20% | 0.17% |
| Superior colliculus, superficial gray layer                                       | SCsg    | 448209 | 235244 | 269611 | 189715250 | 0.24% | 0.12% | 0.14% | 0.17% |
| Posterior pretectal nucleus                                                       | PPT     | 19207  | 9991   | 12471  | 8403750   | 0.23% | 0.12% | 0.15% | 0.17% |
| undefined part of the Agranular insular area, dorsal part                         | Ald_0   | 149    | 0      | 20     | 35000     | 0.43% | 0.00% | 0.06% | 0.16% |
| Infralimbic area, layer 2/3                                                       | ILA2/3  | 237337 | 35638  | 37584  | 64584250  | 0.37% | 0.06% | 0.06% | 0.16% |
| undefined part of the Superior colliculus, motor related, intermediate gray layer | SCig_0  | 513755 | 298436 | 428831 | 260707500 | 0.20% | 0.11% | 0.16% | 0.16% |
| Substantia nigra, reticular part                                                  | SNr     | 512548 | 185699 | 293392 | 209310250 | 0.24% | 0.09% | 0.14% | 0.16% |
| Trochlear nucleus                                                                 | IV      | 1913   | 768    | 1561   | 907250    | 0.21% | 0.08% | 0.17% | 0.16% |
| Mediodorsal nucleus of thalamus                                                   | MD      | 292631 | 186827 | 295475 | 168142000 | 0.17% | 0.11% | 0.18% | 0.15% |
| Gustatory areas, layer 1                                                          | GU1     | 114400 | 35996  | 97970  | 53901000  | 0.21% | 0.07% | 0.18% | 0.15% |
| Basomedial amygdalar nucleus                                                      | BMA     | 268928 | 193392 | 161499 | 135457750 | 0.20% | 0.14% | 0.12% | 0.15% |
| Infralimbic area, layer 5                                                         | ILA5    | 198668 | 26537  | 37619  | 58523250  | 0.34% | 0.05% | 0.06% | 0.15% |
| Agranular insular area, posterior part, layer 2/3                                 | Alp2/3  | 119741 | 82763  | 88600  | 65035000  | 0.18% | 0.13% | 0.14% | 0.15% |
| Agranular insular area, dorsal part, layer 5                                      | Ald5    | 234096 | 37277  | 95660  | 82023750  | 0.29% | 0.05% | 0.12% | 0.15% |
| Gustatory areas, layer 2/3                                                        | GU2/3   | 188798 | 58613  | 131358 | 85143500  | 0.22% | 0.07% | 0.15% | 0.15% |
| Nucleus of the lateral olfactory tract, layer 3                                   | NLOT3   | 61332  | 34639  | 30596  | 28535750  | 0.21% | 0.12% | 0.11% | 0.15% |
| Orbital area, medial part, layer 1                                                | ORBm1   | 103212 | 27399  | 41318  | 38792500  | 0.27% | 0.07% | 0.11% | 0.15% |
| Visceral area, layer 2/3                                                          | VISC2/3 | 103064 | 43312  | 85348  | 52793000  | 0.20% | 0.08% | 0.16% | 0.15% |
| Lateral septal nucleus, caudal (caudodorsal) part                                 | LSc     | 181539 | 56734  | 52439  | 67021250  | 0.27% | 0.08% | 0.08% | 0.14% |
| Retrosplenial area, ventral part, layer 1                                         | RSPv1   | 141016 | 47811  | 129932 | 73496000  | 0.19% | 0.07% | 0.18% | 0.14% |
| Superior central nucleus raphe                                                    | CS      | 201618 | 106616 | 57154  | 84660500  | 0.24% | 0.13% | 0.07% | 0.14% |
| Agranular insular area, ventral part, layer 2/3                                   | Alv2/3  | 220449 | 34226  | 76830  | 77108000  | 0.29% | 0.04% | 0.10% | 0.14% |
| Ectorhinal area/Layer 2/3                                                         | ECT2/3  | 178144 | 69549  | 84895  | 78064250  | 0.23% | 0.09% | 0.11% | 0.14% |
| Anterior cingulate area, ventral part, layer 1                                    | ACAv1   | 121000 | 44446  | 124359 | 68549000  | 0.18% | 0.06% | 0.18% | 0.14% |
| Postpiriform transition area                                                      | TR      | 239615 | 134655 | 165792 | 129173000 | 0.19% | 0.10% | 0.13% | 0.14% |
| Red nucleus                                                                       | RN      | 92546  | 76066  | 165011 | 80400750  | 0.12% | 0.09% | 0.21% | 0.14% |
| Globus pallidus, internal segment                                                 | GPI     | 117626 | 52275  | 49456  | 53079250  | 0.22% | 0.10% | 0.09% | 0.14% |
| Barrington's nucleus                                                              | B       | 6855   | 9228   | 2128   | 4464500   | 0.15% | 0.21% | 0.05% | 0.14% |
| posteromedial visual area, layer 6b                                               | VISpm6b | 5635   | 4617   | 9070   | 4738250   | 0.12% | 0.10% | 0.19% | 0.14% |
| Anteromedial visual area, layer 1                                                 | VISam1  | 28038  | 11975  | 23683  | 15622750  | 0.18% | 0.08% | 0.15% | 0.14% |
| Medial geniculate complex                                                         | MG      | 95942  | 37698  | 99360  | 58819000  | 0.16% | 0.06% | 0.17% | 0.13% |
| undefined part of the tectospinal pathway                                         | tsp_0   | 32758  | 24411  | 20829  | 19808500  | 0.17% | 0.12% | 0.11% | 0.13% |
| Agranular insular area, dorsal part, layer 2/3                                    | Ald2/3  | 318486 | 88811  | 128785 | 137821750 | 0.23% | 0.06% | 0.09% | 0.13% |
| Prelimbic area, layer 1                                                           | PL1     | 114636 | 57960  | 69272  | 62299250  | 0.18% | 0.09% | 0.11% | 0.13% |
| Gustatory areas, layer 4                                                          | GU4     | 47547  | 12299  | 38686  | 25442750  | 0.19% | 0.05% | 0.15% | 0.13% |
| Ectorhinal area/Layer 1                                                           | ECT1    | 85363  | 36581  | 65633  | 48570250  | 0.18% | 0.08% | 0.14% | 0.13% |
| Orbital area, lateral part, layer 6b                                              | ORB16b  | 137    | 2      | 14     | 39750     | 0.34% | 0.01% | 0.04% | 0.13% |
| Midbrain trigeminal nucleus                                                       | MEV     | 9031   | 5352   | 2708   | 4454000   | 0.20% | 0.12% | 0.06% | 0.13% |
| Retrosplenial area, lateral agranular part, layer 1                               | RSPagl1 | 75527  | 23660  | 46555  | 37984250  | 0.20% | 0.06% | 0.12% | 0.13% |
| anterior commissure, olfactory limb                                               | aco     | 267040 | 56036  | 95454  | 109733500 | 0.24% | 0.05% | 0.09% | 0.13% |
| Nucleus of the lateral olfactory tract, molecular layer                           | NLOT1   | 43907  | 13685  | 20232  | 20506500  | 0.21% | 0.07% | 0.10% | 0.13% |
| Ectorhinal area/Layer 6b                                                          | ECT6b   | 27332  | 6556   | 14459  | 12881250  | 0.21% | 0.05% | 0.11% | 0.13% |
| Orbital area, ventrolateral part, layer 6a                                        | ORBvl6a | 50966  | 8654   | 14486  | 19844750  | 0.26% | 0.04% | 0.07% | 0.12% |
| Endopiriform nucleus, ventral part                                                | EPv     | 88008  | 51930  | 69140  | 57104000  | 0.15% | 0.09% | 0.12% | 0.12% |

|                                                              |           |        |        |        |           |       |       |       |       |
|--------------------------------------------------------------|-----------|--------|--------|--------|-----------|-------|-------|-------|-------|
| Agranular insular area, posterior part, layer 1              | Alp1      | 84220  | 58563  | 77810  | 60401750  | 0.14% | 0.10% | 0.13% | 0.12% |
| Nucleus of the optic tract                                   | NOT       | 17803  | 7208   | 14003  | 10737500  | 0.17% | 0.07% | 0.13% | 0.12% |
| Anterior cingulate area, dorsal part, layer 1                | ACAd1     | 113188 | 48895  | 87052  | 68595250  | 0.17% | 0.07% | 0.13% | 0.12% |
| Agranular insular area, posterior part, layer 6a             | Alp6a     | 44226  | 34014  | 20977  | 27460500  | 0.16% | 0.12% | 0.08% | 0.12% |
| Agranular insular area, ventral part, layer 5                | Alv5      | 111022 | 25246  | 46292  | 50563250  | 0.22% | 0.05% | 0.09% | 0.12% |
| Agranular insular area, dorsal part, layer 6a                | Ald6a     | 53438  | 24791  | 57493  | 37602750  | 0.14% | 0.07% | 0.15% | 0.12% |
| Perirhinal area, layer 6b                                    | PERI6b    | 18621  | 7685   | 10638  | 10247750  | 0.18% | 0.07% | 0.10% | 0.12% |
| Primary somatosensory area, trunk, layer 1                   | SSp-tr1   | 30213  | 6438   | 19446  | 15669500  | 0.19% | 0.04% | 0.12% | 0.12% |
| Superior colliculus, motor related, deep white layer         | SCdw      | 57216  | 44201  | 50525  | 42569000  | 0.13% | 0.10% | 0.12% | 0.12% |
| undefined part of the Cortical subplate                      | CTXsp_0   | 361486 | 157409 | 216008 | 206334500 | 0.18% | 0.08% | 0.10% | 0.12% |
| Gustatory areas, layer 6b                                    | GU6b      | 5683   | 8718   | 17115  | 8859500   | 0.06% | 0.10% | 0.19% | 0.12% |
| Agranular insular area, posterior part, layer 5              | Alp5      | 97059  | 52911  | 52105  | 57050000  | 0.17% | 0.09% | 0.09% | 0.12% |
| Visceral area, layer 4                                       | VISC4     | 38982  | 11546  | 36432  | 24653000  | 0.16% | 0.05% | 0.15% | 0.12% |
| brachium of the inferior colliculus                          | bic       | 78797  | 24980  | 46584  | 42779750  | 0.18% | 0.06% | 0.11% | 0.12% |
| Perirhinal area, layer 6a                                    | PERI6a    | 55556  | 26577  | 34998  | 33472250  | 0.17% | 0.08% | 0.10% | 0.12% |
| Primary somatosensory area, lower limb, layer 1              | SSp-ll1   | 51522  | 13707  | 25534  | 26125750  | 0.20% | 0.05% | 0.10% | 0.12% |
| Infralimbic area, layer 6a                                   | ILA6a     | 104396 | 19762  | 31829  | 44914750  | 0.23% | 0.04% | 0.07% | 0.12% |
| posteromedial visual area, layer 1                           | VISpm1    | 29850  | 13477  | 32184  | 21782250  | 0.14% | 0.06% | 0.15% | 0.12% |
| Pedunculopontine nucleus                                     | PPN       | 120766 | 46395  | 31173  | 57636750  | 0.21% | 0.08% | 0.05% | 0.11% |
| Globus pallidus, external segment                            | GPe       | 375747 | 121634 | 195437 | 201414000 | 0.19% | 0.06% | 0.10% | 0.11% |
| Superior colliculus, motor related, intermediate white layer | SCiw      | 341372 | 230394 | 323870 | 261825250 | 0.13% | 0.09% | 0.12% | 0.11% |
| Temporal association areas, layer 6b                         | TEa6b     | 32807  | 6934   | 19663  | 17380750  | 0.19% | 0.04% | 0.11% | 0.11% |
| Primary somatosensory area, trunk, layer 6b                  | SSp-tr6b  | 4590   | 2111   | 7256   | 4106250   | 0.11% | 0.05% | 0.18% | 0.11% |
| Superior colliculus, motor related, deep gray layer          | SCdg      | 199482 | 148679 | 169075 | 152341000 | 0.13% | 0.10% | 0.11% | 0.11% |
| Gustatory areas, layer 5                                     | GU5       | 184384 | 48773  | 116913 | 103699250 | 0.18% | 0.05% | 0.11% | 0.11% |
| Agranular insular area, dorsal part, layer 1                 | Ald1      | 139207 | 44642  | 74791  | 76654750  | 0.18% | 0.06% | 0.10% | 0.11% |
| Ectorhinal area/Layer 6a                                     | ECT6a     | 64031  | 20345  | 42229  | 37536000  | 0.17% | 0.05% | 0.11% | 0.11% |
| Agranular insular area, ventral part, layer 6a               | Alv6a     | 18046  | 8910   | 14104  | 12197500  | 0.15% | 0.07% | 0.12% | 0.11% |
| stria terminalis                                             | st        | 201609 | 45844  | 50112  | 88724250  | 0.23% | 0.05% | 0.06% | 0.11% |
| Visceral area, layer 6a                                      | VISC6a    | 95448  | 39522  | 63142  | 60155500  | 0.16% | 0.07% | 0.10% | 0.11% |
| Postrhinal area, layer 1                                     | VISpor1   | 31780  | 16822  | 11713  | 18329250  | 0.17% | 0.09% | 0.06% | 0.11% |
| Agranular insular area, ventral part, layer 1                | Alv1      | 107664 | 32672  | 56857  | 59983250  | 0.18% | 0.05% | 0.09% | 0.11% |
| Clastrum                                                     | CLA       | 68735  | 61563  | 73084  | 61869500  | 0.11% | 0.10% | 0.12% | 0.11% |
| Cortical amygdalar area, anterior part                       | COAa      | 106484 | 67274  | 60125  | 71681500  | 0.15% | 0.09% | 0.08% | 0.11% |
| cerebal peduncle                                             | cpd       | 172784 | 71073  | 110189 | 109063750 | 0.16% | 0.07% | 0.10% | 0.11% |
| Ventral auditory area, layer 1                               | AUDv1     | 43738  | 17334  | 53216  | 35335750  | 0.12% | 0.05% | 0.15% | 0.11% |
| Cortical amygdalar area, posterior part                      | COAp      | 369876 | 188290 | 226199 | 243869500 | 0.15% | 0.08% | 0.09% | 0.11% |
| Pontine central gray                                         | PCG       | 109110 | 95140  | 41723  | 76622750  | 0.14% | 0.12% | 0.05% | 0.11% |
| Endopiriform nucleus, dorsal part                            | EPd       | 308212 | 177853 | 241131 | 227104250 | 0.14% | 0.08% | 0.11% | 0.11% |
| Parabrachial nucleus                                         | PB        | 189770 | 108309 | 50630  | 108954500 | 0.17% | 0.10% | 0.05% | 0.11% |
| Temporal association areas, layer 1                          | TEa1      | 81201  | 26064  | 67942  | 54754750  | 0.15% | 0.05% | 0.12% | 0.11% |
| Ventral auditory area, layer 6b                              | AUDv6b    | 20180  | 6082   | 6468   | 10259250  | 0.20% | 0.06% | 0.06% | 0.11% |
| Primary somatosensory area, trunk, layer 6a                  | SSp-tr6a  | 26747  | 10526  | 29433  | 20951250  | 0.13% | 0.05% | 0.14% | 0.11% |
| Postrhinal area, layer 2/3                                   | VISpor2/3 | 87608  | 33639  | 28480  | 47367000  | 0.18% | 0.07% | 0.06% | 0.11% |
| Perirhinal area, layer 2/3                                   | PERI2/3   | 117239 | 72461  | 95802  | 90513000  | 0.13% | 0.08% | 0.11% | 0.11% |
| Gustatory areas, layer 6a                                    | GU6a      | 122257 | 61659  | 110201 | 93332500  | 0.13% | 0.07% | 0.12% | 0.11% |
| Retrosplenial area, ventral part, layer 2/3                  | RSPv2/3   | 246484 | 89151  | 207604 | 172481250 | 0.14% | 0.05% | 0.12% | 0.10% |
| Postrhinal area, layer 6b                                    | VISpor6b  | 2610   | 2545   | 1108   | 1996250   | 0.13% | 0.13% | 0.06% | 0.10% |

|                                                      |          |             |        |        |           |       |       |       |       |
|------------------------------------------------------|----------|-------------|--------|--------|-----------|-------|-------|-------|-------|
| Retrosplenial area, lateral agranular part, layer 6a | RSPagl6a | 40388       | 10969  | 35016  | 27556000  | 0.15% | 0.04% | 0.13% | 0.10% |
| Temporal association areas, layer 4                  | TEa4     | 51286       | 16105  | 22412  | 28698000  | 0.18% | 0.06% | 0.08% | 0.10% |
| undefined part of the Olfactory areas                | OLF_0    | 107728<br>6 | 245023 | 351148 | 537401500 | 0.20% | 0.05% | 0.07% | 0.10% |
| midbrain tract of the trigeminal nerve               | mtV      | 2757        | 1719   | 543    | 1612000   | 0.17% | 0.11% | 0.03% | 0.10% |
| inferior colliculus commissure                       | cic      | 2969        | 1985   | 2964   | 2545250   | 0.12% | 0.08% | 0.12% | 0.10% |
| Ectorhinal area/Layer 5                              | ECT5     | 121700      | 44463  | 77432  | 78649750  | 0.15% | 0.06% | 0.10% | 0.10% |
| Paracentral nucleus                                  | PCN      | 35958       | 18920  | 47389  | 33044000  | 0.11% | 0.06% | 0.14% | 0.10% |
| Infralimbic area, layer 6b                           | ILA6b    | 15369       | 5802   | 15394  | 11840250  | 0.13% | 0.05% | 0.13% | 0.10% |
| Orbital area, ventrolateral part, layer 2/3          | ORBvl2/3 | 167040      | 13787  | 31858  | 69219250  | 0.24% | 0.02% | 0.05% | 0.10% |
| Orbital area, medial part, layer 2/3                 | ORBm2/3  | 87403       | 23719  | 28580  | 45567750  | 0.19% | 0.05% | 0.06% | 0.10% |
| Nucleus incertus                                     | NI       | 21668       | 23817  | 6239   | 16948250  | 0.13% | 0.14% | 0.04% | 0.10% |
| Visceral area, layer 6b                              | VISC6b   | 5559        | 4300   | 6354   | 5345000   | 0.10% | 0.08% | 0.12% | 0.10% |
| Basolateral amygdalar nucleus, ventral part          | BLAv     | 40493       | 23346  | 34451  | 32441250  | 0.12% | 0.07% | 0.11% | 0.10% |
| Ventral part of the lateral geniculate complex       | LGv      | 83037       | 23084  | 45778  | 50524750  | 0.16% | 0.05% | 0.09% | 0.10% |
| Temporal association areas, layer 2/3                | TEa2/3   | 128056      | 43737  | 74319  | 82080750  | 0.16% | 0.05% | 0.09% | 0.10% |
| Laterodorsal tegmental nucleus                       | LDT      | 15757       | 20207  | 7416   | 14487250  | 0.11% | 0.14% | 0.05% | 0.10% |
| Orbital area, medial part, layer 5                   | ORBm5    | 50151       | 17818  | 21133  | 30014750  | 0.17% | 0.06% | 0.07% | 0.10% |
| Anteromedial visual area, layer 6b                   | VISam6b  | 3249        | 1704   | 1928   | 2330500   | 0.14% | 0.07% | 0.08% | 0.10% |
| Anterior cingulate area, ventral part, 6a            | ACAv6a   | 48822       | 16446  | 40544  | 35940000  | 0.14% | 0.05% | 0.11% | 0.10% |
| Primary visual area, layer 1                         | VISp1    | 145845      | 88070  | 86580  | 109036750 | 0.13% | 0.08% | 0.08% | 0.10% |
| Visceral area, layer 5                               | VISC5    | 81556       | 27475  | 69170  | 60676000  | 0.13% | 0.05% | 0.11% | 0.10% |
| Temporal association areas, layer 6a                 | TEa6a    | 82257       | 29055  | 62319  | 59380500  | 0.14% | 0.05% | 0.10% | 0.10% |
| Agranular insular area, dorsal part, layer 6b        | Ald6b    | 594         | 552    | 1181   | 805750    | 0.07% | 0.07% | 0.15% | 0.10% |
| Secondary motor area, layer 1                        | MOs1     | 328377      | 122131 | 224262 | 234627500 | 0.14% | 0.05% | 0.10% | 0.10% |
| Anteromedial visual area, layer 6a                   | VISam6a  | 18839       | 10768  | 23516  | 18472750  | 0.10% | 0.06% | 0.13% | 0.10% |
| Parasubiculum                                        | PAR      | 167363      | 84989  | 83088  | 117209500 | 0.14% | 0.07% | 0.07% | 0.10% |
| Primary somatosensory area, unassigned, layer 1      | SSp-un1  | 29001       | 10140  | 9196   | 16890750  | 0.17% | 0.06% | 0.05% | 0.10% |
| Posterior auditory area, layer 4                     | AUDpo4   | 3069        | 1930   | 2617   | 2663750   | 0.12% | 0.07% | 0.10% | 0.10% |
| Anterior pretectal nucleus                           | APN      | 183882      | 66822  | 160298 | 143862250 | 0.13% | 0.05% | 0.11% | 0.10% |
| cingulum bundle                                      | cing     | 169102      | 70296  | 136192 | 131620500 | 0.13% | 0.05% | 0.10% | 0.10% |
| dorsal hippocampal commissure                        | dhc      | 126247      | 90228  | 119978 | 118288000 | 0.11% | 0.08% | 0.10% | 0.09% |
| Retrosplenial area, dorsal part, layer 6b            | RSPd6b   | 3033        | 1732   | 2062   | 2416750   | 0.13% | 0.07% | 0.09% | 0.09% |
| Primary motor area, Layer 1                          | MOp1     | 376718      | 149747 | 279471 | 286047000 | 0.13% | 0.05% | 0.10% | 0.09% |
| Primary somatosensory area, upper limb, layer 1      | SSp-ul1  | 55855       | 21725  | 34323  | 39818500  | 0.14% | 0.05% | 0.09% | 0.09% |
| Locus ceruleus                                       | LC       | 3787        | 1453   | 508    | 2053500   | 0.18% | 0.07% | 0.02% | 0.09% |
| Retrosplenial area, dorsal part, layer 6a            | RSPd6a   | 103315      | 53505  | 94889  | 89994250  | 0.11% | 0.06% | 0.11% | 0.09% |
| Retrosplenial area, dorsal part, layer 1             | RSPd1    | 83514       | 30004  | 57517  | 61210000  | 0.14% | 0.05% | 0.09% | 0.09% |
| Temporal association areas, layer 5                  | TEa5     | 155620      | 62658  | 98722  | 113717000 | 0.14% | 0.06% | 0.09% | 0.09% |
| Anterior olfactory nucleus                           | AON      | 783326      | 232030 | 286896 | 468370000 | 0.17% | 0.05% | 0.06% | 0.09% |
| Orbital area, lateral part, layer 5                  | ORBI5    | 108344      | 24943  | 30449  | 59670250  | 0.18% | 0.04% | 0.05% | 0.09% |
| Orbital area, ventrolateral part, layer 5            | ORBvl5   | 59443       | 11054  | 10736  | 29670250  | 0.20% | 0.04% | 0.04% | 0.09% |
| Perirhinal area, layer 5                             | PERI5    | 98274       | 46950  | 80310  | 82531000  | 0.12% | 0.06% | 0.10% | 0.09% |
| Posterior auditory area, layer 1                     | AUDpo1   | 3678        | 1395   | 3617   | 3194750   | 0.12% | 0.04% | 0.11% | 0.09% |
| Perirhinal area, layer 1                             | PERI1    | 60372       | 39442  | 54451  | 57136000  | 0.11% | 0.07% | 0.10% | 0.09% |
| Suprageniculate nucleus                              | SGN      | 6918        | 235    | 3345   | 3897000   | 0.18% | 0.01% | 0.09% | 0.09% |
| Sublaterodorsal nucleus                              | SLD      | 13514       | 10448  | 2021   | 9654500   | 0.14% | 0.11% | 0.02% | 0.09% |
| Anterior cingulate area, ventral part, 6b            | ACAv6b   | 10731       | 4544   | 7097   | 8332250   | 0.13% | 0.05% | 0.09% | 0.09% |
| Medial habenula                                      | MH       | 81690       | 6469   | 11771  | 37274750  | 0.22% | 0.02% | 0.03% | 0.09% |

|                                                  |                |             |        |        |            |       |       |       |       |
|--------------------------------------------------|----------------|-------------|--------|--------|------------|-------|-------|-------|-------|
| Laterointermediate area, layer 1                 | VISli1         | 8757        | 5833   | 7843   | 8420250    | 0.10% | 0.07% | 0.09% | 0.09% |
| Frontal pole, layer 1                            | FRP1           | 158741      | 18289  | 31603  | 78586000   | 0.20% | 0.02% | 0.04% | 0.09% |
| corpus callosum                                  | cc             | 178579<br>3 | 594841 | 995964 | 1277029750 | 0.14% | 0.05% | 0.08% | 0.09% |
| Entorhinal area, lateral part                    | ENTI           | 131582<br>9 | 733916 | 662564 | 1027386500 | 0.13% | 0.07% | 0.06% | 0.09% |
| Entorhinal area, medial part, dorsal zone        | ENTm           | 438748      | 306264 | 236535 | 374553250  | 0.12% | 0.08% | 0.06% | 0.09% |
| Orbital area, medial part, layer 6a              | ORBm6a         | 22832       | 6432   | 4525   | 12910000   | 0.18% | 0.05% | 0.04% | 0.09% |
| Primary auditory area, layer 1                   | AUDp1          | 37025       | 13008  | 29565  | 30541750   | 0.12% | 0.04% | 0.10% | 0.09% |
| Fasciola cinerea                                 | FC             | 14074       | 696    | 5388   | 7780500    | 0.18% | 0.01% | 0.07% | 0.09% |
| Posterior auditory area, layer 5                 | AUDpo5         | 9379        | 3681   | 5727   | 7251500    | 0.13% | 0.05% | 0.08% | 0.09% |
| Frontal pole, layer 2/3                          | FRP2/3         | 20203       | 4548   | 14471  | 15175000   | 0.13% | 0.03% | 0.10% | 0.09% |
| Retrosplenial area, ventral part, layer 6b       | RSPv6b         | 11830       | 5034   | 10124  | 10448500   | 0.11% | 0.05% | 0.10% | 0.09% |
| Supplemental somatosensory area, layer 6b        | SSs6b          | 20002       | 7008   | 15608  | 16695250   | 0.12% | 0.04% | 0.09% | 0.09% |
| Anterolateral visual area, layer 1               | VISal1         | 16392       | 4803   | 6290   | 10770250   | 0.15% | 0.04% | 0.06% | 0.09% |
| Supplemental somatosensory area, layer 1         | SSs1           | 100857      | 46618  | 89168  | 93157500   | 0.11% | 0.05% | 0.10% | 0.08% |
| Orbital area, lateral part, layer 6a             | ORBl6a         | 37254       | 12887  | 9548   | 23527750   | 0.16% | 0.05% | 0.04% | 0.08% |
| superior cerebellar peduncles                    | scp            | 83829       | 36718  | 23262  | 56704750   | 0.15% | 0.06% | 0.04% | 0.08% |
| Lateral visual area, layer 1                     | VISl1          | 20794       | 14431  | 12480  | 18837000   | 0.11% | 0.08% | 0.07% | 0.08% |
| posteromedial visual area, layer 6a              | VISpm6a        | 22842       | 11434  | 22749  | 22656750   | 0.10% | 0.05% | 0.10% | 0.08% |
| Postrhinal area, layer 6a                        | VISpor6a       | 21223       | 12505  | 6987   | 16194000   | 0.13% | 0.08% | 0.04% | 0.08% |
| Ventral auditory area, layer 6a                  | AUDv6a         | 82171       | 30550  | 38339  | 60198250   | 0.14% | 0.05% | 0.06% | 0.08% |
| Supplemental somatosensory area, layer 6a        | SSs6a          | 180065      | 50203  | 105774 | 134378500  | 0.13% | 0.04% | 0.08% | 0.08% |
| Anterior cingulate area, dorsal part, layer 6b   | ACAd6b         | 7266        | 3363   | 3779   | 5762250    | 0.13% | 0.06% | 0.07% | 0.08% |
| Central lateral nucleus of the thalamus          | CL             | 34158       | 12985  | 27922  | 30082250   | 0.11% | 0.04% | 0.09% | 0.08% |
| Basolateral amygdalar nucleus, anterior part     | BLAa           | 109874      | 50235  | 65234  | 90539000   | 0.12% | 0.06% | 0.07% | 0.08% |
| Posterior auditory area, layer 2/3               | AUDpo2/3       | 7712        | 2648   | 4722   | 6066500    | 0.13% | 0.04% | 0.08% | 0.08% |
| Retrosplenial area, ventral part, layer 6a       | RSPv6a         | 115342      | 52211  | 117654 | 114891000  | 0.10% | 0.05% | 0.10% | 0.08% |
| Primary visual area, layer 6b                    | VISp6b         | 15738       | 18847  | 15716  | 20272750   | 0.08% | 0.09% | 0.08% | 0.08% |
| Anterior area, layer 1                           | VISa1          | 14435       | 4798   | 7209   | 10762500   | 0.13% | 0.04% | 0.07% | 0.08% |
| undefined part of the fiber tracts               | fiber tracts_0 | 615334      | 180665 | 350397 | 466800500  | 0.13% | 0.04% | 0.08% | 0.08% |
| Subceruleus nucleus                              | SLC            | 5446        | 2464   | 1485   | 3827500    | 0.14% | 0.06% | 0.04% | 0.08% |
| Orbital area, ventrolateral part, layer 1        | ORBvl1         | 83446       | 8608   | 27427  | 48945750   | 0.17% | 0.02% | 0.06% | 0.08% |
| undefined part of the rubrospinal tract          | rust_0         | 50019       | 23503  | 34905  | 44561000   | 0.11% | 0.05% | 0.08% | 0.08% |
| Secondary motor area, layer 6b                   | MOs6b          | 14898       | 5143   | 8000   | 11572750   | 0.13% | 0.04% | 0.07% | 0.08% |
| Orbital area, ventrolateral part, layer 6b       | ORBvl6b        | 311         | 12     | 18     | 140750     | 0.22% | 0.01% | 0.01% | 0.08% |
| Lateral posterior nucleus of the thalamus        | LP             | 137988      | 53716  | 133409 | 135425000  | 0.10% | 0.04% | 0.10% | 0.08% |
| Cuneiform nucleus                                | CUN            | 45535       | 25297  | 17159  | 36698250   | 0.12% | 0.07% | 0.05% | 0.08% |
| Anterior area, layer 6a                          | VISa6a         | 13539       | 7362   | 8516   | 12277500   | 0.11% | 0.06% | 0.07% | 0.08% |
| Postrhinal area, layer 5                         | VISpor5        | 59897       | 24950  | 23159  | 45630500   | 0.13% | 0.05% | 0.05% | 0.08% |
| Primary somatosensory area, lower limb, layer 6b | SSp-ll6b       | 15384       | 4423   | 9544   | 12410000   | 0.12% | 0.04% | 0.08% | 0.08% |
| Anterior cingulate area, dorsal part, layer 6a   | ACAd6a         | 49830       | 20569  | 33634  | 44006000   | 0.11% | 0.05% | 0.08% | 0.08% |
| internal capsule                                 | int            | 394120      | 122543 | 195345 | 304109250  | 0.13% | 0.04% | 0.06% | 0.08% |
| Nucleus raphe pontis                             | RPO            | 8487        | 3222   | 696    | 5340500    | 0.16% | 0.06% | 0.01% | 0.08% |
| Postsubiculum                                    | POST           | 112711      | 68078  | 60968  | 104179000  | 0.11% | 0.07% | 0.06% | 0.08% |
| Ventral auditory area, layer 2/3                 | AUDv2/3        | 71321       | 27002  | 51062  | 64618750   | 0.11% | 0.04% | 0.08% | 0.08% |
| Prelimbic area, layer 6a                         | PL6a           | 44583       | 16442  | 11848  | 31543000   | 0.14% | 0.05% | 0.04% | 0.08% |
| Secondary motor area, layer 2/3                  | MOs2/3         | 394196      | 236629 | 307761 | 407936000  | 0.10% | 0.06% | 0.08% | 0.08% |
| Parabigeminal nucleus                            | PBG            | 13909       | 4413   | 5971   | 10577750   | 0.13% | 0.04% | 0.06% | 0.08% |
| habenular commissure                             | hbc            | 13020       | 410    | 3035   | 7170000    | 0.18% | 0.01% | 0.04% | 0.08% |

|                                                           |           |             |             |             |            |       |       |       |       |
|-----------------------------------------------------------|-----------|-------------|-------------|-------------|------------|-------|-------|-------|-------|
| Secondary motor area, layer 6a                            | MOs6a     | 193199      | 63536       | 101413      | 155988000  | 0.12% | 0.04% | 0.07% | 0.08% |
| fimbria                                                   | fi        | 251511      | 70590       | 81736       | 176381750  | 0.14% | 0.04% | 0.05% | 0.08% |
| amygdalar capsule                                         | amc       | 9118        | 6952        | 5825        | 9581250    | 0.10% | 0.07% | 0.06% | 0.08% |
| Anterior area, layer 6b                                   | VISa6b    | 1979        | 1444        | 681         | 1805500    | 0.11% | 0.08% | 0.04% | 0.08% |
| undefined part of the Hippocampal formation               | HPF_0     | 350803      | 215165      | 199125      | 336645750  | 0.10% | 0.06% | 0.06% | 0.08% |
| Piriform-amygdalar area                                   | PAA       | 83865       | 62081       | 56517       | 89601750   | 0.09% | 0.07% | 0.06% | 0.08% |
| Retrosplenial area, dorsal part, layer 2/3                | RSPd2/3   | 142824      | 52156       | 87759       | 125267250  | 0.11% | 0.04% | 0.07% | 0.08% |
| Ventral auditory area, layer 5                            | AUDv5     | 101246      | 42562       | 65768       | 93063750   | 0.11% | 0.05% | 0.07% | 0.08% |
| Orbital area, lateral part, layer 2/3                     | ORBI2/3   | 144804      | 20578       | 30084       | 86875250   | 0.17% | 0.02% | 0.03% | 0.07% |
| Primary motor area, Layer 6b                              | MOp6b     | 83018       | 34353       | 77840       | 86831000   | 0.10% | 0.04% | 0.09% | 0.07% |
| Primary visual area, layer 6a                             | VISp6a    | 158173      | 108342      | 94091       | 160470500  | 0.10% | 0.07% | 0.06% | 0.07% |
| Dorsal auditory area, layer 1                             | AUDd1     | 64142       | 26318       | 36677       | 56650000   | 0.11% | 0.05% | 0.06% | 0.07% |
| Retrosplenial area, lateral agranular part, layer 5       | RSPagl5   | 56694       | 17498       | 33958       | 48270250   | 0.12% | 0.04% | 0.07% | 0.07% |
| Posterolateral visual area, layer 6a                      | VISpl6a   | 15769       | 20160       | 4767        | 18163750   | 0.09% | 0.11% | 0.03% | 0.07% |
| Retrosplenial area, lateral agranular part, layer 2/3     | RSPagl2/3 | 55989       | 14894       | 35242       | 47806750   | 0.12% | 0.03% | 0.07% | 0.07% |
| Basolateral amygdalar nucleus, posterior part             | BLAp      | 70855       | 43332       | 61970       | 79409750   | 0.09% | 0.05% | 0.08% | 0.07% |
| Tegmental reticular nucleus                               | TRN       | 73388       | 65987       | 57901       | 89083250   | 0.08% | 0.07% | 0.06% | 0.07% |
| Ventral auditory area, layer 4                            | AUDv4     | 37083       | 15728       | 20217       | 32978500   | 0.11% | 0.05% | 0.06% | 0.07% |
| Primary somatosensory area, mouth, layer 1                | SSp-m1    | 98224       | 44908       | 69537       | 96111250   | 0.10% | 0.05% | 0.07% | 0.07% |
| Intergeniculate leaflet of the lateral geniculate complex | IGL       | 10859       | 2603        | 5953        | 8863250    | 0.12% | 0.03% | 0.07% | 0.07% |
| Nucleus sagulum                                           | SAG       | 10723       | 9132        | 5434        | 11649750   | 0.09% | 0.08% | 0.05% | 0.07% |
| Anterior cingulate area, ventral part, layer 5            | ACAv5     | 86256       | 26954       | 43542       | 72305750   | 0.12% | 0.04% | 0.06% | 0.07% |
| Laterointermediate area, layer 6a                         | VISli6a   | 11709       | 6686        | 4330        | 10532500   | 0.11% | 0.06% | 0.04% | 0.07% |
| Primary somatosensory area, lower limb, layer 6a          | SSp-ll6a  | 46742       | 20655       | 35650       | 47768000   | 0.10% | 0.04% | 0.07% | 0.07% |
| medial longitudinal fascicle                              | mif       | 130350      | 82541       | 75283       | 133600750  | 0.10% | 0.06% | 0.06% | 0.07% |
| alveus                                                    | alv       | 81828       | 28827       | 34187       | 67320500   | 0.12% | 0.04% | 0.05% | 0.07% |
| Retrosplenial area, ventral part, layer 5                 | RSPv5     | 202926      | 96228       | 189778      | 229474500  | 0.09% | 0.04% | 0.08% | 0.07% |
| Primary motor area, Layer 6a                              | MOp6a     | 510393      | 177166      | 326167      | 476051000  | 0.11% | 0.04% | 0.07% | 0.07% |
| Caudoputamen                                              | CP        | 365272<br>8 | 119984<br>8 | 185737<br>4 | 3178247500 | 0.11% | 0.04% | 0.06% | 0.07% |
| Primary somatosensory area, mouth, layer 6a               | SSp-m6a   | 173438      | 47287       | 106763      | 155120250  | 0.11% | 0.03% | 0.07% | 0.07% |
| Anterolateral visual area, layer 6a                       | VISal6a   | 12580       | 6768        | 12856       | 15255250   | 0.08% | 0.04% | 0.08% | 0.07% |
| Lateral dorsal nucleus of thalamus                        | LD        | 119219      | 46425       | 114473      | 133251500  | 0.09% | 0.03% | 0.09% | 0.07% |
| Prelimbic area, layer 5                                   | PL5       | 61349       | 23353       | 33422       | 56421500   | 0.11% | 0.04% | 0.06% | 0.07% |
| Primary somatosensory area, barrel field, layer 1         | SSp-bfd1  | 71308       | 37209       | 33952       | 68137500   | 0.10% | 0.05% | 0.05% | 0.07% |
| Secondary motor area, layer 5                             | MOs5      | 328975      | 180911      | 274391      | 375197000  | 0.09% | 0.05% | 0.07% | 0.07% |
| Anterior cingulate area, dorsal part, layer 5             | ACAAd5    | 72711       | 43425       | 59508       | 85288500   | 0.09% | 0.05% | 0.07% | 0.07% |
| Nucleus raphe magnus                                      | RM        | 9646        | 16478       | 7783        | 16509250   | 0.06% | 0.10% | 0.05% | 0.07% |
| Presubiculum                                              | PRE       | 130729      | 71657       | 67263       | 131407000  | 0.10% | 0.05% | 0.05% | 0.07% |
| Primary auditory area, layer 6b                           | AUDp6b    | 17859       | 3898        | 3621        | 12423500   | 0.14% | 0.03% | 0.03% | 0.07% |
| Posterolateral visual area, layer 2/3                     | VISpl2/3  | 17142       | 13972       | 7312        | 19125000   | 0.09% | 0.07% | 0.04% | 0.07% |
| Posterolateral visual area, layer 1                       | VISpl1    | 7140        | 8009        | 2137        | 8693250    | 0.08% | 0.09% | 0.02% | 0.07% |
| Primary auditory area, layer 5                            | AUDp5     | 94838       | 28536       | 57408       | 90992000   | 0.10% | 0.03% | 0.06% | 0.07% |
| Anterolateral visual area, layer 6b                       | VISal6b   | 3120        | 733         | 1825        | 2880500    | 0.11% | 0.03% | 0.06% | 0.07% |
| Subiculum                                                 | SUB       | 578347      | 224286      | 310939      | 565091750  | 0.10% | 0.04% | 0.06% | 0.07% |
| Retrosplenial area, dorsal part, layer 5                  | RSPd5     | 138201      | 50729       | 105240      | 149292750  | 0.09% | 0.03% | 0.07% | 0.07% |
| Primary somatosensory area, unassigned, layer 6b          | SSp-un6b  | 6817        | 5626        | 4603        | 8677000    | 0.08% | 0.06% | 0.05% | 0.07% |
| Lateral visual area, layer 6a                             | VISl6a    | 18763       | 11413       | 18719       | 24957750   | 0.08% | 0.05% | 0.08% | 0.07% |
| Retrosplenial area, lateral agranular part, layer 6b      | RSPagl6b  | 301         | 131         | 199         | 323000     | 0.09% | 0.04% | 0.06% | 0.07% |

|                                                   |             |         |        |        |            |       |       |       |       |
|---------------------------------------------------|-------------|---------|--------|--------|------------|-------|-------|-------|-------|
| Primary somatosensory area, lower limb, layer 2/3 | SSp-II2/3   | 73418   | 19381  | 35016  | 65507000   | 0.11% | 0.03% | 0.05% | 0.07% |
| Supragenual nucleus                               | SG          | 1925    | 1547   | 813    | 2200750    | 0.09% | 0.07% | 0.04% | 0.06% |
| Primary motor area, Layer 2/3                     | MOp2/3      | 588986  | 247846 | 419790 | 646293750  | 0.09% | 0.04% | 0.06% | 0.06% |
| Rostrolateral area, layer 1                       | VISr1       | 14969   | 6040   | 7359   | 14669500   | 0.10% | 0.04% | 0.05% | 0.06% |
| Primary somatosensory area, nose, layer 6b        | SSp-n6b     | 10930   | 3680   | 5806   | 10614000   | 0.10% | 0.03% | 0.05% | 0.06% |
| Piriform area                                     | PIR         | 1654538 | 580350 | 847996 | 1603371750 | 0.10% | 0.04% | 0.05% | 0.06% |
| Anterior cingulate area, dorsal part, layer 2/3   | ACAAd2/3    | 96748   | 41175  | 52452  | 99149750   | 0.10% | 0.04% | 0.05% | 0.06% |
| Dorsal auditory area, layer 6b                    | AUDd6b      | 23075   | 5844   | 11239  | 21010000   | 0.11% | 0.03% | 0.05% | 0.06% |
| Lateral visual area, layer 6b                     | VISl6b      | 2289    | 901    | 2619   | 3056000    | 0.07% | 0.03% | 0.09% | 0.06% |
| undefined part of the ventricular systems         | VS_0        | 21573   | 9025   | 37745  | 35957750   | 0.06% | 0.03% | 0.10% | 0.06% |
| Primary somatosensory area, upper limb, layer 6b  | SSp-ul6b    | 22249   | 7410   | 11048  | 21520750   | 0.10% | 0.03% | 0.05% | 0.06% |
| Dorsal part of the lateral geniculate complex     | LGd         | 86522   | 24425  | 59590  | 90361250   | 0.10% | 0.03% | 0.07% | 0.06% |
| Laterointermediate area, layer 5                  | VISli5      | 17649   | 8239   | 9371   | 18852750   | 0.09% | 0.04% | 0.05% | 0.06% |
| Reticular nucleus of the thalamus                 | RT          | 122078  | 83651  | 113944 | 171307500  | 0.07% | 0.05% | 0.07% | 0.06% |
| Primary somatosensory area, mouth, layer 6b       | SSp-m6b     | 10097   | 6390   | 12088  | 15483250   | 0.07% | 0.04% | 0.08% | 0.06% |
| Pontine reticular nucleus                         | PRNr        | 262371  | 158850 | 165662 | 320300500  | 0.08% | 0.05% | 0.05% | 0.06% |
| undefined part of the Isocortex                   | Isocortex_0 | 2       | 0      | 14     | 8750       | 0.02% | 0.00% | 0.16% | 0.06% |
| Dentate gyrus, polymorph layer                    | DG-po       | 47217   | 103968 | 31178  | 99779750   | 0.05% | 0.10% | 0.03% | 0.06% |
| Rostrolateral area, layer 6a                      | VISr6a      | 17861   | 9582   | 11018  | 21193500   | 0.08% | 0.05% | 0.05% | 0.06% |
| Primary motor area, Layer 5                       | MOp5        | 576480  | 219899 | 418971 | 671548250  | 0.09% | 0.03% | 0.06% | 0.06% |
| posteromedial visual area, layer 5                | VISpm5      | 22588   | 11110  | 25337  | 32913750   | 0.07% | 0.03% | 0.08% | 0.06% |
| Agranular insular area, ventral part, layer 6b    | Alv6b       | 27      | 7      | 0      | 19000      | 0.14% | 0.04% | 0.00% | 0.06% |
| Dorsal auditory area, layer 6a                    | AUDd6a      | 86794   | 32559  | 63149  | 102019500  | 0.09% | 0.03% | 0.06% | 0.06% |
| Lateral amygdalar nucleus                         | LA          | 68873   | 28779  | 45193  | 80255500   | 0.09% | 0.04% | 0.06% | 0.06% |
| Posterior auditory area, layer 6a                 | AUDpo6a     | 2128    | 806    | 1601   | 2560000    | 0.08% | 0.03% | 0.06% | 0.06% |
| Primary somatosensory area, trunk, layer 5        | SSp-tr5     | 35644   | 20705  | 30088  | 48841000   | 0.07% | 0.04% | 0.06% | 0.06% |
| Postrhinal area, layer 4                          | VISpor4     | 4643    | 1389   | 1863   | 4539250    | 0.10% | 0.03% | 0.04% | 0.06% |
| Anterolateral visual area, layer 5                | VISal5      | 16186   | 14956  | 16469  | 27399250   | 0.06% | 0.05% | 0.06% | 0.06% |
| Primary somatosensory area, upper limb, layer 6a  | SSp-ul6a    | 80278   | 29901  | 49096  | 91842250   | 0.09% | 0.03% | 0.05% | 0.06% |
| Rostrolateral area, layer 6b                      | VISr6b      | 3871    | 3561   | 1819   | 5347750    | 0.07% | 0.07% | 0.03% | 0.06% |
| Supplemental somatosensory area, layer 4          | SSs4        | 76791   | 35425  | 57632  | 98427000   | 0.08% | 0.04% | 0.06% | 0.06% |
| Primary somatosensory area, mouth, layer 4        | SSp-m4      | 99174   | 25180  | 65840  | 111284500  | 0.09% | 0.02% | 0.06% | 0.06% |
| Lateral visual area, layer 5                      | VISl5       | 28123   | 17323  | 26920  | 42357000   | 0.07% | 0.04% | 0.06% | 0.06% |
| Posterolateral visual area, layer 5               | VISpl5      | 20020   | 17859  | 9375   | 27902250   | 0.07% | 0.06% | 0.03% | 0.06% |
| Orbital area, lateral part, layer 1               | ORBI1       | 37215   | 7403   | 14052  | 34997000   | 0.11% | 0.02% | 0.04% | 0.06% |
| Primary somatosensory area, nose, layer 1         | SSp-n1      | 33609   | 20643  | 15300  | 41518500   | 0.08% | 0.05% | 0.04% | 0.06% |
| Primary somatosensory area, mouth, layer 5        | SSp-m5      | 145901  | 61363  | 130153 | 202511500  | 0.07% | 0.03% | 0.06% | 0.06% |
| Primary auditory area, layer 2/3                  | AUDp2/3     | 67046   | 15374  | 45063  | 76514750   | 0.09% | 0.02% | 0.06% | 0.06% |
| Supplemental somatosensory area, layer 5          | SSs5        | 149834  | 57733  | 94010  | 183235000  | 0.08% | 0.03% | 0.05% | 0.05% |
| Dorsal auditory area, layer 5                     | AUDd5       | 120322  | 40032  | 83219  | 148407750  | 0.08% | 0.03% | 0.06% | 0.05% |
| Inferior salivatory nucleus                       | ISN         | 1087    | 10     | 386    | 904000     | 0.12% | 0.00% | 0.04% | 0.05% |
| Anterior cingulate area, ventral part, layer 2/3  | ACAAd2/3    | 80708   | 31431  | 36446  | 90753000   | 0.09% | 0.03% | 0.04% | 0.05% |
| Posterior complex of the thalamus                 | PO          | 108374  | 42219  | 91376  | 148144750  | 0.07% | 0.03% | 0.06% | 0.05% |
| Prelimbic area, layer 2/3                         | PL2/3       | 68968   | 16238  | 21645  | 66579500   | 0.10% | 0.02% | 0.03% | 0.05% |
| lateral lemniscus                                 | ll          | 105720  | 46064  | 35787  | 117007500  | 0.09% | 0.04% | 0.03% | 0.05% |
| Primary auditory area, layer 6a                   | AUDp6a      | 38100   | 10586  | 19749  | 42700000   | 0.09% | 0.02% | 0.05% | 0.05% |
| Primary visual area, layer 5                      | VISp5       | 201575  | 99391  | 108403 | 257813750  | 0.08% | 0.04% | 0.04% | 0.05% |
| Primary somatosensory area, lower limb, layer 5   | SSp-II5     | 53430   | 19141  | 32176  | 65983500   | 0.08% | 0.03% | 0.05% | 0.05% |

|                                                                  |           |        |        |        |           |       |       |       |       |
|------------------------------------------------------------------|-----------|--------|--------|--------|-----------|-------|-------|-------|-------|
| Subgeniculate nucleus                                            | SubG      | 2476   | 1121   | 1610   | 3326000   | 0.07% | 0.03% | 0.05% | 0.05% |
| Nucleus ambiguus, dorsal division                                | AMBd      | 859    | 1256   | 1606   | 2379000   | 0.04% | 0.05% | 0.07% | 0.05% |
| Anterolateral visual area, layer 2/3                             | VISal2/3  | 17852  | 6943   | 10778  | 22848500  | 0.08% | 0.03% | 0.05% | 0.05% |
| Pontine gray                                                     | PG        | 76136  | 46671  | 61892  | 119109750 | 0.06% | 0.04% | 0.05% | 0.05% |
| Anterior area, layer 5                                           | VISa5     | 15049  | 8246   | 9190   | 21044250  | 0.07% | 0.04% | 0.04% | 0.05% |
| Primary somatosensory area, upper limb, layer 5                  | SSp-ul5   | 89077  | 39861  | 53890  | 119889250 | 0.07% | 0.03% | 0.04% | 0.05% |
| Primary somatosensory area, barrel field, layer 6a               | SSp-bfd6a | 108964 | 41697  | 79642  | 152911750 | 0.07% | 0.03% | 0.05% | 0.05% |
| undefined part of the Retrosplenial area, lateral agranular part | RSPagl_0  | 4407   | 2263   | 3187   | 6558000   | 0.07% | 0.03% | 0.05% | 0.05% |
| undefined part of the Pons                                       | P_0       | 537320 | 360082 | 231293 | 754856000 | 0.07% | 0.05% | 0.03% | 0.05% |
| Laterointermediate area, layer 2/3                               | VISli2/3  | 11508  | 5846   | 5794   | 15541750  | 0.07% | 0.04% | 0.04% | 0.05% |
| Anteromedial visual area, layer 5                                | VISam5    | 12758  | 8696   | 18985  | 27247750  | 0.05% | 0.03% | 0.07% | 0.05% |
| undefined part of the Primary motor area                         | MOP_0     | 45738  | 16454  | 35809  | 66255250  | 0.07% | 0.02% | 0.05% | 0.05% |
| Supplemental somatosensory area, layer 2/3                       | SSs2/3    | 118001 | 68697  | 117586 | 206006500 | 0.06% | 0.03% | 0.06% | 0.05% |
| Primary auditory area, layer 4                                   | AUDp4     | 27616  | 6806   | 13384  | 32475000  | 0.09% | 0.02% | 0.04% | 0.05% |
| posteromedial visual area, layer 2/3                             | VISpm2/3  | 23359  | 10911  | 22806  | 38841750  | 0.06% | 0.03% | 0.06% | 0.05% |
| Inferior olivary complex                                         | IO        | 21135  | 53979  | 19786  | 64762250  | 0.03% | 0.08% | 0.03% | 0.05% |
| Posterior auditory area, layer 6b                                | AUDpo6b   | 475    | 75     | 195    | 510250    | 0.09% | 0.01% | 0.04% | 0.05% |
| Primary somatosensory area, trunk, layer 2/3                     | SSp-tr2/3 | 31471  | 10276  | 23018  | 44474750  | 0.07% | 0.02% | 0.05% | 0.05% |
| Ventral anterior-lateral complex of the thalamus                 | VAL       | 58799  | 29096  | 41385  | 90158500  | 0.07% | 0.03% | 0.05% | 0.05% |
| Dentate gyrus, granule cell layer                                | DG-sg     | 68706  | 156303 | 58948  | 198278500 | 0.03% | 0.08% | 0.03% | 0.05% |
| Inferior colliculus                                              | IC        | 378950 | 322166 | 296826 | 698627000 | 0.05% | 0.05% | 0.04% | 0.05% |
| undefined part of the root                                       | root_0    | 21     | 17     | 59     | 68000     | 0.03% | 0.03% | 0.09% | 0.05% |
| Primary somatosensory area, nose, layer 6a                       | SSp-n6a   | 89055  | 17217  | 39439  | 103312750 | 0.09% | 0.02% | 0.04% | 0.05% |
| Anteromedial visual area, layer 2/3                              | VISam2/3  | 17338  | 9709   | 9300   | 26016250  | 0.07% | 0.04% | 0.04% | 0.05% |
| Primary somatosensory area, lower limb, layer 4                  | SSp-ll4   | 22149  | 6904   | 11257  | 28858500  | 0.08% | 0.02% | 0.04% | 0.05% |
| Posterolateral visual area, layer 4                              | VISpl4    | 5040   | 1590   | 1391   | 5767000   | 0.09% | 0.03% | 0.02% | 0.05% |
| Oculomotor nucleus                                               | III       | 2005   | 1976   | 2144   | 4431250   | 0.05% | 0.04% | 0.05% | 0.05% |
| Prelimbic area, layer 6b                                         | PL6b      | 1907   | 706    | 1014   | 2628250   | 0.07% | 0.03% | 0.04% | 0.05% |
| Primary somatosensory area, unassigned, layer 6a                 | SSp-un6a  | 23230  | 16119  | 18128  | 42494000  | 0.05% | 0.04% | 0.04% | 0.05% |
| Primary somatosensory area, barrel field, layer 6b               | SSp-bfd6b | 18198  | 6920   | 13799  | 28945000  | 0.06% | 0.02% | 0.05% | 0.04% |
| Rostrolateral area, layer 5                                      | VISrl5    | 17686  | 15770  | 17908  | 38339000  | 0.05% | 0.04% | 0.05% | 0.04% |
| Primary somatosensory area, upper limb, layer 4                  | SSp-ul4   | 49025  | 12315  | 17532  | 58926500  | 0.08% | 0.02% | 0.03% | 0.04% |
| Dorsal auditory area, layer 4                                    | AUDd4     | 33810  | 12684  | 21039  | 50461250  | 0.07% | 0.03% | 0.04% | 0.04% |
| Nucleus raphe obscurus                                           | RO        | 790    | 397    | 1513   | 2046500   | 0.04% | 0.02% | 0.07% | 0.04% |
| undefined part of the corticospinal tract                        | cst_0     | 4268   | 2665   | 5890   | 9814750   | 0.04% | 0.03% | 0.06% | 0.04% |
| Primary somatosensory area, upper limb, layer 2/3                | SSp-ul2/3 | 81289  | 28604  | 44329  | 118693000 | 0.07% | 0.02% | 0.04% | 0.04% |
| Dorsal auditory area, layer 2/3                                  | AUDd2/3   | 77527  | 25511  | 49386  | 117574000 | 0.07% | 0.02% | 0.04% | 0.04% |
| Primary somatosensory area, barrel field, layer 5                | SSp-bfd5  | 101095 | 64014  | 92960  | 202048500 | 0.05% | 0.03% | 0.05% | 0.04% |
| posteromedial visual area, layer 4                               | VISpm4    | 5438   | 3660   | 8475   | 13826000  | 0.04% | 0.03% | 0.06% | 0.04% |
| Primary somatosensory area, unassigned, layer 5                  | SSp-un5   | 30365  | 9813   | 27732  | 53656250  | 0.06% | 0.02% | 0.05% | 0.04% |
| Laterointermediate area, layer 4                                 | VISli4    | 3824   | 1745   | 1532   | 5718250   | 0.07% | 0.03% | 0.03% | 0.04% |
| Primary visual area, layer 2/3                                   | VISp2/3   | 151213 | 83743  | 83931  | 257886750 | 0.06% | 0.03% | 0.03% | 0.04% |
| Anterolateral visual area, layer 4                               | VISal4    | 5138   | 2974   | 3524   | 9579000   | 0.05% | 0.03% | 0.04% | 0.04% |
| Laterointermediate area, layer 6b                                | VISli6b   | 1135   | 413    | 525    | 1720750   | 0.07% | 0.02% | 0.03% | 0.04% |
| Lateral visual area, layer 2/3                                   | VISl2/3   | 24499  | 13740  | 10661  | 40591500  | 0.06% | 0.03% | 0.03% | 0.04% |
| Retrosplenial area, dorsal part, layer 4                         | RSPd4     | 766    | 847    | 673    | 1928750   | 0.04% | 0.04% | 0.03% | 0.04% |
| Supratrigeminal nucleus                                          | SUT       | 16083  | 4790   | 3145   | 20502750  | 0.08% | 0.02% | 0.02% | 0.04% |
| Nucleus of the lateral lemniscus                                 | NLL       | 48659  | 29697  | 14292  | 81728000  | 0.06% | 0.04% | 0.02% | 0.04% |

|                                                     |            |             |        |        |            |       |       |       |       |
|-----------------------------------------------------|------------|-------------|--------|--------|------------|-------|-------|-------|-------|
| Anteromedial visual area, layer 4                   | VISam4     | 2891        | 2584   | 5417   | 9868250    | 0.03% | 0.03% | 0.05% | 0.04% |
| Primary somatosensory area, mouth, layer 2/3        | SSp-m2/3   | 128894      | 44835  | 100117 | 248496250  | 0.05% | 0.02% | 0.04% | 0.04% |
| Accessory olfactory bulb, glomerular layer          | AOBgl      | 17297       | 2566   | 143    | 18309500   | 0.09% | 0.01% | 0.00% | 0.04% |
| Primary somatosensory area, nose, layer 5           | SSp-n5     | 51562       | 22408  | 45405  | 109283000  | 0.05% | 0.02% | 0.04% | 0.04% |
| Ventral posteromedial nucleus of the thalamus       | VPM        | 75095       | 25449  | 118523 | 200555000  | 0.04% | 0.01% | 0.06% | 0.04% |
| Rostrolateral area, layer 2/3                       | VISrl2/3   | 15248       | 9715   | 10982  | 33112250   | 0.05% | 0.03% | 0.03% | 0.04% |
| Anterior area, layer 4                              | VISa4      | 4456        | 1793   | 3150   | 8659250    | 0.05% | 0.02% | 0.04% | 0.04% |
| Hypoglossal nucleus                                 | XII        | 13027       | 21851  | 12771  | 44049000   | 0.03% | 0.05% | 0.03% | 0.04% |
| Lateral visual area, layer 4                        | VISl4      | 6691        | 5328   | 4178   | 15230500   | 0.04% | 0.03% | 0.03% | 0.04% |
| ventral hippocampal commissure                      | vhc        | 7827        | 1229   | 6235   | 14559750   | 0.05% | 0.01% | 0.04% | 0.04% |
| Main olfactory bulb                                 | MOB        | 130259<br>9 | 342239 | 443648 | 2010458500 | 0.06% | 0.02% | 0.02% | 0.03% |
| Magnocellular reticular nucleus                     | MARN       | 14120       | 44022  | 25156  | 80381750   | 0.02% | 0.05% | 0.03% | 0.03% |
| third ventricle                                     | V3         | 31824       | 43733  | 93890  | 163944250  | 0.02% | 0.03% | 0.06% | 0.03% |
| solitary tract                                      | ts         | 959         | 21     | 305    | 1244250    | 0.08% | 0.00% | 0.02% | 0.03% |
| undefined part of the optic nerve                   | lln_0      | 5415        | 1048   | 1291   | 7562500    | 0.07% | 0.01% | 0.02% | 0.03% |
| pyramid                                             | py         | 7987        | 52622  | 7687   | 67223000   | 0.01% | 0.08% | 0.01% | 0.03% |
| Parapyramidal nucleus                               | PPY        | 1090        | 2436   | 1294   | 4833000    | 0.02% | 0.05% | 0.03% | 0.03% |
| Primary visual area, layer 4                        | VISp4      | 57122       | 27325  | 33471  | 119327000  | 0.05% | 0.02% | 0.03% | 0.03% |
| Primary somatosensory area, unassigned, layer 2/3   | SSp-un2/3  | 28979       | 9731   | 17374  | 56794250   | 0.05% | 0.02% | 0.03% | 0.03% |
| central canal, spinal cord/medulla                  | c          | 83          | 0      | 66     | 160500     | 0.05% | 0.00% | 0.04% | 0.03% |
| Primary somatosensory area, trunk, layer 4          | SSp-tr4    | 4867        | 2077   | 4483   | 12404500   | 0.04% | 0.02% | 0.04% | 0.03% |
| external medullary lamina of the thalamus           | em         | 5393        | 3669   | 5876   | 16218250   | 0.03% | 0.02% | 0.04% | 0.03% |
| Rostrolateral area, layer 4                         | VISrl4     | 5778        | 3706   | 3537   | 14194750   | 0.04% | 0.03% | 0.02% | 0.03% |
| Primary somatosensory area, barrel field, layer 4   | SSp-bfd4   | 40149       | 20682  | 31623  | 101109250  | 0.04% | 0.02% | 0.03% | 0.03% |
| Primary somatosensory area, nose, layer 4           | SSp-n4     | 25854       | 13910  | 16350  | 62837500   | 0.04% | 0.02% | 0.03% | 0.03% |
| Primary somatosensory area, unassigned, layer 4     | SSp-un4    | 11016       | 4497   | 7055   | 25277500   | 0.04% | 0.02% | 0.03% | 0.03% |
| Parvicellular reticular nucleus                     | PARN       | 49354       | 76453  | 77956  | 229987000  | 0.02% | 0.03% | 0.03% | 0.03% |
| Primary somatosensory area, barrel field, layer 2/3 | SSp-bfd2/3 | 88984       | 48116  | 57147  | 220246750  | 0.04% | 0.02% | 0.03% | 0.03% |
| Nucleus of the trapezoid body                       | NTB        | 3975        | 2551   | 4148   | 12561000   | 0.03% | 0.02% | 0.03% | 0.03% |
| motor root of the trigeminal nerve                  | moV        | 1748        | 2783   | 1971   | 7759750    | 0.02% | 0.04% | 0.03% | 0.03% |
| Accessory facial motor nucleus                      | ACVII      | 76          | 446    | 62     | 703500     | 0.01% | 0.06% | 0.01% | 0.03% |
| undefined part of the Ectorhinal area               | ECT_0      | 63          | 72     | 8      | 175500     | 0.04% | 0.04% | 0.00% | 0.03% |
| Paragigantocellular reticular nucleus, lateral part | PGRNI      | 16943       | 19668  | 29035  | 81939500   | 0.02% | 0.02% | 0.04% | 0.03% |
| Pontine reticular nucleus, caudal part              | PRNc       | 115826      | 127420 | 54021  | 386949000  | 0.03% | 0.03% | 0.01% | 0.03% |
| Accessory olfactory bulb, granular layer            | AOBgr      | 3641        | 6923   | 9220   | 26524250   | 0.01% | 0.03% | 0.03% | 0.02% |
| Anterior area, layer 2/3                            | VISa2/3    | 7006        | 3376   | 4404   | 19829500   | 0.04% | 0.02% | 0.02% | 0.02% |
| Ventral posterolateral nucleus of the thalamus      | VPL        | 25561       | 9275   | 23411  | 78452500   | 0.03% | 0.01% | 0.03% | 0.02% |
| Facial motor nucleus                                | VII        | 16624       | 37819  | 18028  | 101278750  | 0.02% | 0.04% | 0.02% | 0.02% |
| Primary somatosensory area, nose, layer 2/3         | SSp-n2/3   | 33007       | 28094  | 25937  | 123972750  | 0.03% | 0.02% | 0.02% | 0.02% |
| Nucleus of the solitary tract                       | NTS        | 18466       | 8509   | 15881  | 62210750   | 0.03% | 0.01% | 0.03% | 0.02% |
| lateral olfactory tract, body                       | lot        | 71684       | 17986  | 16270  | 158061000  | 0.05% | 0.01% | 0.01% | 0.02% |
| middle cerebellar peduncle                          | mcp        | 21627       | 36800  | 18765  | 116145500  | 0.02% | 0.03% | 0.02% | 0.02% |
| Nucleus raphe pallidus                              | RPA        | 844         | 1378   | 797    | 4561250    | 0.02% | 0.03% | 0.02% | 0.02% |
| Nucleus of Roller                                   | NR         | 497         | 659    | 608    | 2721000    | 0.02% | 0.02% | 0.02% | 0.02% |
| Field CA3                                           | CA3        | 239098      | 107973 | 97795  | 693316250  | 0.03% | 0.02% | 0.01% | 0.02% |
| Medullary reticular nucleus, dorsal part            | MDRNd      | 13965       | 3833   | 9479   | 43896750   | 0.03% | 0.01% | 0.02% | 0.02% |
| undefined part of the Medulla                       | MY_0       | 197651      | 240916 | 231750 | 1124482000 | 0.02% | 0.02% | 0.02% | 0.02% |
| Accessory olfactory bulb, mitral layer              | AOBmi      | 17488       | 1008   | 2053   | 34670500   | 0.05% | 0.00% | 0.01% | 0.02% |



|                                                    |         |        |       |        |            |       |       |       |       |
|----------------------------------------------------|---------|--------|-------|--------|------------|-------|-------|-------|-------|
| Nucleus y                                          | y       | 107    | 711   | 970    | 3252500    | 0.00% | 0.02% | 0.03% | 0.02% |
| Nucleus x                                          | x       | 1590   | 1032  | 1525   | 7766500    | 0.02% | 0.01% | 0.02% | 0.02% |
| Intermediate reticular nucleus                     | IRN     | 48251  | 51259 | 60192  | 300109500  | 0.02% | 0.02% | 0.02% | 0.02% |
| Lateral reticular nucleus                          | LRN     | 8292   | 14865 | 9549   | 61493250   | 0.01% | 0.02% | 0.02% | 0.02% |
| Dorsal motor nucleus of the vagus nerve            | DMX     | 2218   | 596   | 3110   | 11139500   | 0.02% | 0.01% | 0.03% | 0.02% |
| Field CA2                                          | CA2     | 33806  | 11036 | 46371  | 173796750  | 0.02% | 0.01% | 0.03% | 0.02% |
| Motor nucleus of trigeminal                        | V       | 13684  | 5202  | 5020   | 47422750   | 0.03% | 0.01% | 0.01% | 0.02% |
| Field CA1                                          | CA1     | 275158 | 80681 | 157794 | 1083860750 | 0.03% | 0.01% | 0.01% | 0.02% |
| trapezoid body                                     | tb      | 3280   | 9220  | 3727   | 35672000   | 0.01% | 0.03% | 0.01% | 0.02% |
| Paragigantocellular reticular nucleus, dorsal part | PGRNd   | 2887   | 3678  | 1986   | 19122750   | 0.02% | 0.02% | 0.01% | 0.01% |
| Dentate gyrus, molecular layer                     | DG-mo   | 94263  | 78310 | 50568  | 501397750  | 0.02% | 0.02% | 0.01% | 0.01% |
| Nucleus prepositus                                 | PRP     | 2600   | 2046  | 3911   | 19311000   | 0.01% | 0.01% | 0.02% | 0.01% |
| Nucleus ambiguus, ventral division                 | AMBv    | 186    | 649   | 292    | 2735000    | 0.01% | 0.02% | 0.01% | 0.01% |
| Gigantocellular reticular nucleus                  | GRN     | 21916  | 32978 | 39961  | 236149250  | 0.01% | 0.01% | 0.02% | 0.01% |
| Superior vestibular nucleus                        | SUV     | 7275   | 5911  | 3841   | 44632750   | 0.02% | 0.01% | 0.01% | 0.01% |
| facial nerve                                       | VIIIn   | 2342   | 979   | 1556   | 12927750   | 0.02% | 0.01% | 0.01% | 0.01% |
| lateral ventricle                                  | VL      | 62393  | 41471 | 10934  | 312116750  | 0.02% | 0.01% | 0.00% | 0.01% |
| Linear nucleus of the medulla                      | LIN     | 211    | 546   | 419    | 3210250    | 0.01% | 0.02% | 0.01% | 0.01% |
| Medullary reticular nucleus, ventral part          | MDRNv   | 9621   | 10468 | 13035  | 93978250   | 0.01% | 0.01% | 0.01% | 0.01% |
| Spinal nucleus of the trigeminal, caudal part      | SPVC    | 23191  | 19142 | 15177  | 165441500  | 0.01% | 0.01% | 0.01% | 0.01% |
| Infracerebellar nucleus                            | ICB     | 221    | 72    | 123    | 1222750    | 0.02% | 0.01% | 0.01% | 0.01% |
| Dorsal cochlear nucleus                            | DCO     | 7114   | 8971  | 8815   | 73529250   | 0.01% | 0.01% | 0.01% | 0.01% |
| Superior olivary complex, medial part              | SOCm    | 1792   | 3898  | 486    | 18419500   | 0.01% | 0.02% | 0.00% | 0.01% |
| Abducens nucleus                                   | VI      | 466    | 70    | 277    | 2531250    | 0.02% | 0.00% | 0.01% | 0.01% |
| Superior olivary complex, periolivary region       | POR     | 261    | 4228  | 501    | 16124750   | 0.00% | 0.03% | 0.00% | 0.01% |
| Cuneate nucleus                                    | CU      | 5942   | 705   | 4294   | 37229000   | 0.02% | 0.00% | 0.01% | 0.01% |
| Principal sensory nucleus of the trigeminal        | PSV     | 20615  | 11973 | 5997   | 137937250  | 0.01% | 0.01% | 0.00% | 0.01% |
| spinal tract of the trigeminal nerve               | sptV    | 13069  | 22729 | 18797  | 198469250  | 0.01% | 0.01% | 0.01% | 0.01% |
| Medial vestibular nucleus                          | MV      | 13965  | 19267 | 9945   | 169698750  | 0.01% | 0.01% | 0.01% | 0.01% |
| Superior olivary complex, lateral part             | SOCI    | 1923   | 3100  | 1120   | 24225500   | 0.01% | 0.01% | 0.00% | 0.01% |
| External cuneate nucleus                           | ECU     | 1405   | 179   | 1214   | 11412000   | 0.01% | 0.00% | 0.01% | 0.01% |
| Dentate nucleus                                    | DN      | 2138   | 5669  | 1615   | 41877250   | 0.01% | 0.01% | 0.00% | 0.01% |
| Spinal vestibular nucleus                          | SPIV    | 4434   | 7389  | 4789   | 76891000   | 0.01% | 0.01% | 0.01% | 0.01% |
| vomeronasal nerve                                  | von     | 8      | 0     | 0      | 37250      | 0.02% | 0.00% | 0.00% | 0.01% |
| Spinal nucleus of the trigeminal, oral part        | SPVO    | 2669   | 6351  | 4746   | 64187000   | 0.00% | 0.01% | 0.01% | 0.01% |
| olfactory nerve layer of main olfactory bulb       | onI     | 57303  | 17091 | 26567  | 488937250  | 0.01% | 0.00% | 0.01% | 0.01% |
| Spinal nucleus of the trigeminal, interpolar part  | SPVI    | 10323  | 8856  | 10260  | 147001250  | 0.01% | 0.01% | 0.01% | 0.01% |
| Lateral vestibular nucleus                         | LAV     | 1161   | 1772  | 555    | 17641250   | 0.01% | 0.01% | 0.00% | 0.01% |
| arbor vitae                                        | arb     | 50578  | 81743 | 41444  | 881583000  | 0.01% | 0.01% | 0.00% | 0.01% |
| Interposed nucleus                                 | IP      | 5651   | 11829 | 2564   | 107709500  | 0.01% | 0.01% | 0.00% | 0.01% |
| Parasolitary nucleus                               | PAS     | 242    | 0     | 39     | 1663750    | 0.01% | 0.00% | 0.00% | 0.01% |
| inferior cerebellar peduncle                       | icp     | 5956   | 7100  | 1780   | 93589250   | 0.01% | 0.01% | 0.00% | 0.01% |
| vestibular nerve                                   | vVIIIIn | 1162   | 2656  | 628    | 30077750   | 0.00% | 0.01% | 0.00% | 0.00% |
| cerebral aqueduct                                  | AQ      | 4586   | 2493  | 894    | 55956500   | 0.01% | 0.00% | 0.00% | 0.00% |
| Central lobule                                     | CENT    | 37823  | 25422 | 6072   | 489045500  | 0.01% | 0.01% | 0.00% | 0.00% |
| Fastigial nucleus                                  | FN      | 2883   | 3669  | 1242   | 63838250   | 0.00% | 0.01% | 0.00% | 0.00% |
| Flocculus                                          | FL      | 629    | 15636 | 3777   | 164955000  | 0.00% | 0.01% | 0.00% | 0.00% |
| Paraflocculus                                      | PFL     | 17975  | 38087 | 27367  | 697266500  | 0.00% | 0.01% | 0.00% | 0.00% |

|                                        |      |       |       |       |            |       |       |       |       |
|----------------------------------------|------|-------|-------|-------|------------|-------|-------|-------|-------|
| Ventral cochlear nucleus               | VCO  | 3083  | 6409  | 1606  | 94171250   | 0.00% | 0.01% | 0.00% | 0.00% |
| Lingula (I)                            | LING | 724   | 323   | 631   | 15226500   | 0.00% | 0.00% | 0.00% | 0.00% |
| Simple lobule                          | SIM  | 8249  | 37591 | 21649 | 684476500  | 0.00% | 0.01% | 0.00% | 0.00% |
| Paramedian lobule                      | PRM  | 18322 | 27198 | 7898  | 616368250  | 0.00% | 0.00% | 0.00% | 0.00% |
| Ansiform lobule                        | AN   | 40136 | 61411 | 16468 | 1430332250 | 0.00% | 0.00% | 0.00% | 0.00% |
| Copula pyramidis                       | COPY | 8338  | 9259  | 5079  | 303139250  | 0.00% | 0.00% | 0.00% | 0.00% |
| undefined part of the fourth ventricle | V4_0 | 3874  | 2623  | 800   | 98841000   | 0.00% | 0.00% | 0.00% | 0.00% |
| Uvula (IX)                             | UVU  | 2977  | 11175 | 2918  | 275051250  | 0.00% | 0.00% | 0.00% | 0.00% |
| Gracile nucleus                        | GR   | 415   | 3     | 94    | 8419000    | 0.00% | 0.00% | 0.00% | 0.00% |
| cuneate fascicle                       | cuf  | 128   | 38    | 8     | 3062000    | 0.00% | 0.00% | 0.00% | 0.00% |
| gracile fascicle                       | grf  | 8     | 0     | 11    | 404250     | 0.00% | 0.00% | 0.00% | 0.00% |
| Declive (VI)                           | DEC  | 5998  | 10895 | 5072  | 470493000  | 0.00% | 0.00% | 0.00% | 0.00% |
| Culmen                                 | CUL  | 13475 | 19512 | 4532  | 875706250  | 0.00% | 0.00% | 0.00% | 0.00% |
| lateral recess                         | V4r  | 820   | 1757  | 649   | 104093250  | 0.00% | 0.00% | 0.00% | 0.00% |
| Nodulus (X)                            | NOD  | 1138  | 2260  | 1252  | 157113500  | 0.00% | 0.00% | 0.00% | 0.00% |
| Subfornical organ                      | SFO  | 31    | 25    | 23    | 2780000    | 0.00% | 0.00% | 0.00% | 0.00% |
| Pyramus (VIII)                         | PYR  | 1979  | 184   | 738   | 114696250  | 0.00% | 0.00% | 0.00% | 0.00% |
| Folium-tuber vermis (VII)              | FOTU | 1331  | 832   | 676   | 115648250  | 0.00% | 0.00% | 0.00% | 0.00% |
| Area postrema                          | AP   | 0     | 0     | 29    | 5699250    | 0.00% | 0.00% | 0.00% | 0.00% |
| undefined part of the Cerebellum       | CB_0 | 0     | 0     | 0     | 1250       | 0.00% | 0.00% | 0.00% | 0.00% |

Table S2. Excluded brain regions containing injection sites.

| Region                                                  | Abbreviation | Fluorescent labeled pixels |         |         | Brain region pixels | Fluorescence density value |        |        |         |
|---------------------------------------------------------|--------------|----------------------------|---------|---------|---------------------|----------------------------|--------|--------|---------|
|                                                         |              | 192979                     | 193973  | 193974  |                     | 192979                     | 193973 | 193974 | average |
| Lateral mammillary nucleus                              | LM           | 114595                     | 172722  | 149756  | 4097500             | 2.80%                      | 4.22%  | 3.65%  | 3.56%   |
| Tuberomammillary nucleus, dorsal part                   | TMd          | 72803                      | 9130    | 80128   | 1866250             | 3.90%                      | 0.49%  | 4.29%  | 2.89%   |
| Dorsal premammillary nucleus                            | PMd          | 469539                     | 219614  | 161965  | 10592250            | 4.43%                      | 2.07%  | 1.53%  | 2.68%   |
| Ventral premammillary nucleus                           | PMv          | 529557                     | 180497  | 168055  | 10957250            | 4.83%                      | 1.65%  | 1.53%  | 2.67%   |
| Tuberal nucleus                                         | TU           | 1899513                    | 1229619 | 1346597 | 58963250            | 3.22%                      | 2.09%  | 2.28%  | 2.53%   |
| Tuberomammillary nucleus, ventral part                  | TMv          | 89249                      | 54095   | 77600   | 3688000             | 2.42%                      | 1.47%  | 2.10%  | 2.00%   |
| principal mammillary tract                              | pm           | 3115                       | 2243    | 1490    | 117750              | 2.65%                      | 1.90%  | 1.27%  | 1.94%   |
| Supramammillary nucleus                                 | SUM          | 580769                     | 436926  | 409892  | 25251750            | 2.30%                      | 1.73%  | 1.62%  | 1.88%   |
| supramammillary decussation                             | smd          | 45539                      | 34744   | 27981   | 1958500             | 2.33%                      | 1.77%  | 1.43%  | 1.84%   |
| Parasubthalamic nucleus                                 | PSTN         | 139134                     | 145974  | 123344  | 7747750             | 1.80%                      | 1.88%  | 1.59%  | 1.76%   |
| Medial mammillary nucleus                               | MM           | 1714974                    | 1021572 | 745646  | 69972500            | 2.45%                      | 1.46%  | 1.07%  | 1.66%   |
| Lateral hypothalamic area                               | LHA          | 7342854                    | 4832842 | 4748506 | 425986000           | 1.72%                      | 1.13%  | 1.11%  | 1.32%   |
| Posterior hypothalamic nucleus                          | PH           | 1557202                    | 853653  | 917247  | 92188250            | 1.69%                      | 0.93%  | 0.99%  | 1.20%   |
| Preparasubthalamic nucleus                              | PST          | 28112                      | 16389   | 17989   | 1791000             | 1.57%                      | 0.92%  | 1.00%  | 1.16%   |
| undefined part of the Hypothalamus                      | HY_0         | 6541959                    | 3375949 | 3941859 | 454192500           | 1.44%                      | 0.74%  | 0.87%  | 1.02%   |
| mammillotegmental tract                                 | mtg          | 127238                     | 95557   | 80697   | 10544750            | 1.21%                      | 0.91%  | 0.77%  | 0.96%   |
| Periventricular hypothalamic nucleus, posterior part    | PVp          | 202820                     | 84615   | 182659  | 17140500            | 1.18%                      | 0.49%  | 1.07%  | 0.91%   |
| mammillary peduncle                                     | mp           | 39061                      | 15317   | 17122   | 2693250             | 1.45%                      | 0.57%  | 0.64%  | 0.88%   |
| Interfascicular nucleus raphe                           | IF           | 57285                      | 31281   | 15718   | 4284500             | 1.34%                      | 0.73%  | 0.37%  | 0.81%   |
| Dorsomedial nucleus of the hypothalamus                 | DMH          | 695486                     | 275038  | 501993  | 60594250            | 1.15%                      | 0.45%  | 0.83%  | 0.81%   |
| Ventromedial hypothalamic nucleus                       | VMH          | 606618                     | 269732  | 283956  | 58347000            | 1.04%                      | 0.46%  | 0.49%  | 0.66%   |
| Interpeduncular nucleus                                 | IPN          | 356403                     | 323484  | 78775   | 44128000            | 0.81%                      | 0.73%  | 0.18%  | 0.57%   |
| Periventricular hypothalamic nucleus, intermediate part | PVi          | 122039                     | 54247   | 45750   | 12939750            | 0.94%                      | 0.42%  | 0.35%  | 0.57%   |

Table S3. Fluorescence fiber density in various brain regions of HDC-Arch-GFP<sup>TMN</sup> mice.

| Region                                                    | Abbreviation | Density Value | Density Grade |
|-----------------------------------------------------------|--------------|---------------|---------------|
| <b>Cerebrum</b>                                           |              |               |               |
| <b>Cerebral cortex</b>                                    |              |               |               |
| <b>Cortical plate</b>                                     |              |               |               |
| <b>Isocortex</b>                                          |              |               |               |
| Anterior cingulate area, dorsal part, layer 1             | ACAd1        | 0.12%         | moderate      |
| Anterior cingulate area, dorsal part, layer 2/3           | ACAd2/3      | 0.06%         | few           |
| Anterior cingulate area, dorsal part, layer 5             | ACAd5        | 0.07%         | few           |
| Anterior cingulate area, dorsal part, layer 6a            | ACAd6a       | 0.08%         | few           |
| Anterior cingulate area, dorsal part, layer 6b            | ACAd6b       | 0.08%         | few           |
| Anterior cingulate area, ventral part, layer 1            | ACAv1        | 0.14%         | moderate      |
| Anterior cingulate area, ventral part, layer 2/3          | ACAv2/3      | 0.05%         | few           |
| Anterior cingulate area, ventral part, layer 5            | ACAv5        | 0.07%         | few           |
| Anterior cingulate area, ventral part, 6a                 | ACAv6a       | 0.10%         | moderate      |
| Anterior cingulate area, ventral part, 6b                 | ACAv6b       | 0.09%         | few           |
| Agranular insular area, dorsal part, layer 1              | Ald1         | 0.11%         | moderate      |
| Agranular insular area, dorsal part, layer 2/3            | Ald2/3       | 0.13%         | moderate      |
| Agranular insular area, dorsal part, layer 5              | Ald5         | 0.15%         | moderate      |
| Agranular insular area, dorsal part, layer 6a             | Ald6a        | 0.12%         | moderate      |
| Agranular insular area, dorsal part, layer 6b             | Ald6b        | 0.10%         | moderate      |
| undefined part of the Agranular insular area, dorsal part | Ald_0        | 0.16%         | moderate      |
| Agranular insular area, posterior part, layer 1           | Alp1         | 0.12%         | moderate      |
| Agranular insular area, posterior part, layer 2/3         | Alp2/3       | 0.15%         | moderate      |
| Agranular insular area, posterior part, layer 5           | Alp5         | 0.12%         | moderate      |
| Agranular insular area, posterior part, layer 6a          | Alp6a        | 0.12%         | moderate      |
| Agranular insular area, ventral part, layer 1             | Alv1         | 0.11%         | moderate      |
| Agranular insular area, ventral part, layer 2/3           | Alv2/3       | 0.14%         | moderate      |
| Agranular insular area, ventral part, layer 5             | Alv5         | 0.12%         | moderate      |
| Agranular insular area, ventral part, layer 6a            | Alv6a        | 0.11%         | moderate      |
| Agranular insular area, ventral part, layer 6b            | Alv6b        | 0.06%         | few           |
| Dorsal auditory area, layer 1                             | AUDd1        | 0.07%         | few           |
| Dorsal auditory area, layer 2/3                           | AUDd2/3      | 0.04%         | few           |
| Dorsal auditory area, layer 4                             | AUDd4        | 0.04%         | few           |
| Dorsal auditory area, layer 5                             | AUDd5        | 0.05%         | few           |
| Dorsal auditory area, layer 6a                            | AUDd6a       | 0.06%         | few           |
| Dorsal auditory area, layer 6b                            | AUDd6b       | 0.06%         | few           |
| Primary auditory area, layer 1                            | AUDp1        | 0.09%         | few           |
| Primary auditory area, layer 2/3                          | AUDp2/3      | 0.06%         | few           |
| Primary auditory area, layer 4                            | AUDp4        | 0.05%         | few           |
| Primary auditory area, layer 5                            | AUDp5        | 0.07%         | few           |
| Primary auditory area, layer 6a                           | AUDp6a       | 0.05%         | few           |
| Primary auditory area, layer 6b                           | AUDp6b       | 0.07%         | few           |
| Posterior auditory area, layer 1                          | AUDpo1       | 0.09%         | few           |
| Posterior auditory area, layer 2/3                        | AUDpo2/3     | 0.08%         | few           |
| Posterior auditory area, layer 4                          | AUDpo4       | 0.10%         | moderate      |
| Posterior auditory area, layer 5                          | AUDpo5       | 0.09%         | few           |
| Posterior auditory area, layer 6a                         | AUDpo6a      | 0.06%         | few           |
| Posterior auditory area, layer 6b                         | AUDpo6b      | 0.05%         | few           |

|                                             |          |       |          |
|---------------------------------------------|----------|-------|----------|
| Ventral auditory area, layer 1              | AUDv1    | 0.11% | moderate |
| Ventral auditory area, layer 2/3            | AUDv2/3  | 0.08% | few      |
| Ventral auditory area, layer 4              | AUDv4    | 0.07% | few      |
| Ventral auditory area, layer 5              | AUDv5    | 0.08% | few      |
| Ventral auditory area, layer 6a             | AUDv6a   | 0.08% | few      |
| Ventral auditory area, layer 6b             | AUDv6b   | 0.11% | moderate |
| Ectorhinal area/Layer 1                     | ECT1     | 0.13% | moderate |
| Ectorhinal area/Layer 2/3                   | ECT2/3   | 0.14% | moderate |
| Ectorhinal area/Layer 5                     | ECT5     | 0.10% | moderate |
| Ectorhinal area/Layer 6a                    | ECT6a    | 0.11% | moderate |
| Ectorhinal area/Layer 6b                    | ECT6b    | 0.13% | moderate |
| undefined part of the Ectorhinal area       | ECT_0    | 0.03% | few      |
| Frontal pole, layer 1                       | FRP1     | 0.09% | few      |
| Frontal pole, layer 2/3                     | FRP2/3   | 0.09% | few      |
| Gustatory areas, layer 1                    | GU1      | 0.15% | moderate |
| Gustatory areas, layer 2/3                  | GU2/3    | 0.15% | moderate |
| Gustatory areas, layer 4                    | GU4      | 0.13% | moderate |
| Gustatory areas, layer 5                    | GU5      | 0.11% | moderate |
| Gustatory areas, layer 6a                   | GU6a     | 0.11% | moderate |
| Gustatory areas, layer 6b                   | GU6b     | 0.12% | moderate |
| Infralimbic area, layer 1                   | ILA1     | 0.21% | moderate |
| Infralimbic area, layer 2/3                 | ILA2/3   | 0.16% | moderate |
| Infralimbic area, layer 5                   | ILA5     | 0.15% | moderate |
| Infralimbic area, layer 6a                  | ILA6a    | 0.12% | moderate |
| Infralimbic area, layer 6b                  | ILA6b    | 0.10% | moderate |
| Primary motor area, Layer 1                 | MOp1     | 0.09% | few      |
| Primary motor area, Layer 2/3               | MOp2/3   | 0.06% | few      |
| Primary motor area, Layer 5                 | MOp5     | 0.06% | few      |
| Primary motor area, Layer 6a                | MOp6a    | 0.07% | few      |
| Primary motor area, Layer 6b                | MOp6b    | 0.07% | few      |
| undefined part of the Primary motor area    | MOp_0    | 0.05% | few      |
| Secondary motor area, layer 1               | MOs1     | 0.10% | moderate |
| Secondary motor area, layer 2/3             | MOs2/3   | 0.08% | few      |
| Secondary motor area, layer 5               | MOs5     | 0.07% | few      |
| Secondary motor area, layer 6a              | MOs6a    | 0.08% | few      |
| Secondary motor area, layer 6b              | MOs6b    | 0.08% | few      |
| Orbital area, lateral part, layer 1         | ORBI1    | 0.06% | few      |
| Orbital area, lateral part, layer 2/3       | ORBI2/3  | 0.07% | few      |
| Orbital area, lateral part, layer 5         | ORBI5    | 0.09% | few      |
| Orbital area, lateral part, layer 6a        | ORBI6a   | 0.08% | few      |
| Orbital area, lateral part, layer 6b        | ORBI6b   | 0.13% | moderate |
| Orbital area, medial part, layer 1          | ORBm1    | 0.15% | moderate |
| Orbital area, medial part, layer 2/3        | ORBm2/3  | 0.10% | moderate |
| Orbital area, medial part, layer 5          | ORBm5    | 0.10% | moderate |
| Orbital area, medial part, layer 6a         | ORBm6a   | 0.09% | few      |
| Orbital area, ventrolateral part, layer 1   | ORBvl1   | 0.08% | few      |
| Orbital area, ventrolateral part, layer 2/3 | ORBvl2/3 | 0.10% | moderate |
| Orbital area, ventrolateral part, layer 5   | ORBvl5   | 0.09% | few      |
| Orbital area, ventrolateral part, layer 6a  | ORBvl6a  | 0.12% | moderate |
| Orbital area, ventrolateral part, layer 6b  | ORBvl6b  | 0.08% | few      |

|                                                       |            |       |          |
|-------------------------------------------------------|------------|-------|----------|
| Perirhinal area, layer 1                              | PERI1      | 0.09% | few      |
| Perirhinal area, layer 2/3                            | PERI2/3    | 0.11% | moderate |
| Perirhinal area, layer 5                              | PERI5      | 0.09% | few      |
| Perirhinal area, layer 6a                             | PERI6a     | 0.12% | moderate |
| Perirhinal area, layer 6b                             | PERI6b     | 0.12% | moderate |
| Prelimbic area, layer 1                               | PL1        | 0.13% | moderate |
| Prelimbic area, layer 2/3                             | PL2/3      | 0.05% | few      |
| Prelimbic area, layer 5                               | PL5        | 0.07% | few      |
| Prelimbic area, layer 6a                              | PL6a       | 0.08% | few      |
| Prelimbic area, layer 6b                              | PL6b       | 0.05% | few      |
| Retrosplenial area, lateral agranular part, layer 1   | RSPagl1    | 0.13% | moderate |
| Retrosplenial area, lateral agranular part, layer 2/3 | RSPagl2/3  | 0.07% | few      |
| Retrosplenial area, lateral agranular part, layer 5   | RSPagl5    | 0.07% | few      |
| Retrosplenial area, lateral agranular part, layer 6a  | RSPagl6a   | 0.10% | moderate |
| Retrosplenial area, lateral agranular part, layer 6b  | RSPagl6b   | 0.07% | few      |
| Retrosplenial area, dorsal part, layer 1              | RSPd1      | 0.09% | few      |
| Retrosplenial area, dorsal part, layer 2/3            | RSPd2/3    | 0.08% | few      |
| Retrosplenial area, dorsal part, layer 4              | RSPd4      | 0.04% | few      |
| Retrosplenial area, dorsal part, layer 5              | RSPd5      | 0.07% | few      |
| Retrosplenial area, dorsal part, layer 6a             | RSPd6a     | 0.09% | few      |
| Retrosplenial area, dorsal part, layer 6b             | RSPd6b     | 0.09% | few      |
| Retrosplenial area, ventral part, layer 1             | RSPv1      | 0.14% | moderate |
| Retrosplenial area, ventral part, layer 2/3           | RSPv2/3    | 0.10% | moderate |
| Retrosplenial area, ventral part, layer 5             | RSPv5      | 0.07% | few      |
| Retrosplenial area, ventral part, layer 6a            | RSPv6a     | 0.08% | few      |
| Retrosplenial area, ventral part, layer 6b            | RSPv6b     | 0.09% | few      |
| Primary somatosensory area, barrel field, layer 1     | SSp-bfd1   | 0.07% | few      |
| Primary somatosensory area, barrel field, layer 2/3   | SSp-bfd2/3 | 0.03% | few      |
| Primary somatosensory area, barrel field, layer 4     | SSp-bfd4   | 0.03% | few      |
| Primary somatosensory area, barrel field, layer 5     | SSp-bfd5   | 0.04% | few      |
| Primary somatosensory area, barrel field, layer 6a    | SSp-bfd6a  | 0.05% | few      |
| Primary somatosensory area, barrel field, layer 6b    | SSp-bfd6b  | 0.04% | few      |
| Primary somatosensory area, lower limb, layer 1       | SSp-ll1    | 0.12% | moderate |
| Primary somatosensory area, lower limb, layer 2/3     | SSp-ll2/3  | 0.07% | few      |
| Primary somatosensory area, lower limb, layer 4       | SSp-ll4    | 0.05% | few      |
| Primary somatosensory area, lower limb, layer 5       | SSp-ll5    | 0.05% | few      |
| Primary somatosensory area, lower limb, layer 6a      | SSp-ll6a   | 0.07% | few      |
| Primary somatosensory area, lower limb, layer 6b      | SSp-ll6b   | 0.08% | few      |
| Primary somatosensory area, mouth, layer 1            | SSp-m1     | 0.07% | few      |
| Primary somatosensory area, mouth, layer 2/3          | SSp-m2/3   | 0.04% | few      |
| Primary somatosensory area, mouth, layer 4            | SSp-m4     | 0.06% | few      |
| Primary somatosensory area, mouth, layer 5            | SSp-m5     | 0.06% | few      |
| Primary somatosensory area, mouth, layer 6a           | SSp-m6a    | 0.07% | few      |
| Primary somatosensory area, mouth, layer 6b           | SSp-m6b    | 0.06% | few      |
| Primary somatosensory area, nose, layer 1             | SSp-n1     | 0.06% | few      |
| Primary somatosensory area, nose, layer 2/3           | SSp-n2/3   | 0.02% | few      |
| Primary somatosensory area, nose, layer 4             | SSp-n4     | 0.03% | few      |
| Primary somatosensory area, nose, layer 5             | SSp-n5     | 0.04% | few      |
| Primary somatosensory area, nose, layer 6a            | SSp-n6a    | 0.05% | few      |
| Primary somatosensory area, nose, layer 6b            | SSp-n6b    | 0.06% | few      |

|                                                   |           |       |          |
|---------------------------------------------------|-----------|-------|----------|
| Primary somatosensory area, trunk, layer 1        | SSp-tr1   | 0.12% | moderate |
| Primary somatosensory area, trunk, layer 2/3      | SSp-tr2/3 | 0.05% | few      |
| Primary somatosensory area, trunk, layer 4        | SSp-tr4   | 0.03% | few      |
| Primary somatosensory area, trunk, layer 5        | SSp-tr5   | 0.06% | few      |
| Primary somatosensory area, trunk, layer 6a       | SSp-tr6a  | 0.11% | moderate |
| Primary somatosensory area, trunk, layer 6b       | SSp-tr6b  | 0.11% | moderate |
| Primary somatosensory area, upper limb, layer 1   | SSp-ul1   | 0.09% | few      |
| Primary somatosensory area, upper limb, layer 2/3 | SSp-ul2/3 | 0.04% | few      |
| Primary somatosensory area, upper limb, layer 4   | SSp-ul4   | 0.04% | few      |
| Primary somatosensory area, upper limb, layer 5   | SSp-ul5   | 0.05% | few      |
| Primary somatosensory area, upper limb, layer 6a  | SSp-ul6a  | 0.06% | few      |
| Primary somatosensory area, upper limb, layer 6b  | SSp-ul6b  | 0.06% | few      |
| Primary somatosensory area, unassigned, layer 1   | SSp-un1   | 0.10% | moderate |
| Primary somatosensory area, unassigned, layer 2/3 | SSp-un2/3 | 0.03% | few      |
| Primary somatosensory area, unassigned, layer 4   | SSp-un4   | 0.03% | few      |
| Primary somatosensory area, unassigned, layer 5   | SSp-un5   | 0.04% | few      |
| Primary somatosensory area, unassigned, layer 6a  | SSp-un6a  | 0.05% | few      |
| Primary somatosensory area, unassigned, layer 6b  | SSp-un6b  | 0.07% | few      |
| Supplemental somatosensory area, layer 1          | SSs1      | 0.08% | few      |
| Supplemental somatosensory area, layer 2/3        | SSs2/3    | 0.05% | few      |
| Supplemental somatosensory area, layer 4          | SSs4      | 0.06% | few      |
| Supplemental somatosensory area, layer 5          | SSs5      | 0.05% | few      |
| Supplemental somatosensory area, layer 6a         | SSs6a     | 0.08% | few      |
| Supplemental somatosensory area, layer 6b         | SSs6b     | 0.09% | few      |
| Temporal association areas, layer 1               | TEa1      | 0.11% | moderate |
| Temporal association areas, layer 2/3             | TEa2/3    | 0.10% | moderate |
| Temporal association areas, layer 4               | TEa4      | 0.10% | moderate |
| Temporal association areas, layer 5               | TEa5      | 0.09% | few      |
| Temporal association areas, layer 6a              | TEa6a     | 0.10% | moderate |
| Temporal association areas, layer 6b              | TEa6b     | 0.11% | moderate |
| Anterior area, layer 1                            | VISa1     | 0.08% | few      |
| Anterior area, layer 2/3                          | VISa2/3   | 0.02% | few      |
| Anterior area, layer 4                            | VISa4     | 0.04% | few      |
| Anterior area, layer 5                            | VISa5     | 0.05% | few      |
| Anterior area, layer 6a                           | VISa6a    | 0.08% | few      |
| Anterior area, layer 6b                           | VISa6b    | 0.08% | few      |
| Anterolateral visual area, layer 1                | VISal1    | 0.09% | few      |
| Anterolateral visual area, layer 2/3              | VISal2/3  | 0.05% | few      |
| Anterolateral visual area, layer 4                | VISal4    | 0.04% | few      |
| Anterolateral visual area, layer 5                | VISal5    | 0.06% | few      |
| Anterolateral visual area, layer 6a               | VISal6a   | 0.07% | few      |
| Anterolateral visual area, layer 6b               | VISal6b   | 0.07% | few      |
| Anteromedial visual area, layer 1                 | VISam1    | 0.14% | moderate |
| Anteromedial visual area, layer 2/3               | VISam2/3  | 0.05% | few      |
| Anteromedial visual area, layer 4                 | VISam4    | 0.04% | few      |
| Anteromedial visual area, layer 5                 | VISam5    | 0.05% | few      |
| Anteromedial visual area, layer 6a                | VISam6a   | 0.10% | moderate |
| Anteromedial visual area, layer 6b                | VISam6b   | 0.10% | moderate |
| Visceral area, layer 1                            | VISC1     | 0.17% | moderate |
| Visceral area, layer 2/3                          | VISC2/3   | 0.15% | moderate |

|                                                                  |             |       |          |
|------------------------------------------------------------------|-------------|-------|----------|
| Visceral area, layer 4                                           | VISC4       | 0.12% | moderate |
| Visceral area, layer 5                                           | VISC5       | 0.10% | moderate |
| Visceral area, layer 6a                                          | VISC6a      | 0.11% | moderate |
| Visceral area, layer 6b                                          | VISC6b      | 0.10% | moderate |
| Lateral visual area, layer 1                                     | VISI1       | 0.08% | few      |
| Lateral visual area, layer 2/3                                   | VISI2/3     | 0.04% | few      |
| Lateral visual area, layer 4                                     | VISI4       | 0.04% | few      |
| Lateral visual area, layer 5                                     | VISI5       | 0.06% | few      |
| Lateral visual area, layer 6a                                    | VISI6a      | 0.07% | few      |
| Lateral visual area, layer 6b                                    | VISI6b      | 0.06% | few      |
| Laterointermediate area, layer 1                                 | VISli1      | 0.09% | few      |
| Laterointermediate area, layer 2/3                               | VISli2/3    | 0.05% | few      |
| Laterointermediate area, layer 4                                 | VISli4      | 0.04% | few      |
| Laterointermediate area, layer 5                                 | VISli5      | 0.06% | few      |
| Laterointermediate area, layer 6a                                | VISli6a     | 0.07% | few      |
| Laterointermediate area, layer 6b                                | VISli6b     | 0.04% | few      |
| Primary visual area, layer 1                                     | VISp1       | 0.10% | moderate |
| Primary visual area, layer 2/3                                   | VISp2/3     | 0.04% | few      |
| Primary visual area, layer 4                                     | VISp4       | 0.03% | few      |
| Primary visual area, layer 5                                     | VISp5       | 0.05% | few      |
| Primary visual area, layer 6a                                    | VISp6a      | 0.07% | few      |
| Primary visual area, layer 6b                                    | VISp6b      | 0.08% | few      |
| Posterolateral visual area, layer 1                              | VISpl1      | 0.07% | few      |
| Posterolateral visual area, layer 2/3                            | VISpl2/3    | 0.07% | few      |
| Posterolateral visual area, layer 4                              | VISpl4      | 0.05% | few      |
| Posterolateral visual area, layer 5                              | VISpl5      | 0.06% | few      |
| Posterolateral visual area, layer 6a                             | VISpl6a     | 0.07% | few      |
| Posterolateral visual area, layer 6b                             | VISpl6b     | 0.19% | moderate |
| posteromedial visual area, layer 1                               | VISpm1      | 0.12% | moderate |
| posteromedial visual area, layer 2/3                             | VISpm2/3    | 0.05% | few      |
| posteromedial visual area, layer 4                               | VISpm4      | 0.04% | few      |
| posteromedial visual area, layer 5                               | VISpm5      | 0.06% | few      |
| posteromedial visual area, layer 6a                              | VISpm6a     | 0.08% | few      |
| posteromedial visual area, layer 6b                              | VISpm6b     | 0.14% | moderate |
| Postrhinal area, layer 1                                         | VISpor1     | 0.11% | moderate |
| Postrhinal area, layer 2/3                                       | VISpor2/3   | 0.11% | moderate |
| Postrhinal area, layer 4                                         | VISpor4     | 0.06% | few      |
| Postrhinal area, layer 5                                         | VISpor5     | 0.08% | few      |
| Postrhinal area, layer 6a                                        | VISpor6a    | 0.08% | few      |
| Postrhinal area, layer 6b                                        | VISpor6b    | 0.10% | moderate |
| Rostrolateral area, layer 1                                      | VISrl1      | 0.06% | few      |
| Rostrolateral area, layer 2/3                                    | VISrl2/3    | 0.04% | few      |
| Rostrolateral area, layer 4                                      | VISrl4      | 0.03% | few      |
| Rostrolateral area, layer 5                                      | VISrl5      | 0.04% | few      |
| Rostrolateral area, layer 6a                                     | VISrl6a     | 0.06% | few      |
| Rostrolateral area, layer 6b                                     | VISrl6b     | 0.06% | few      |
| undefined part of the Retrosplenial area, lateral agranular part | RSPagl_0    | 0.05% | few      |
| undefined part of the Isocortex                                  | Isocortex_0 | 0.06% | few      |
| <b>Olfactory areas</b>                                           |             |       |          |
| Accessory olfactory bulb, glomerular layer                       | AOBgl       | 0.04% | few      |



|                                                         |         |       |          |
|---------------------------------------------------------|---------|-------|----------|
| Accessory olfactory bulb, granular layer                | AOBgr   | 0.02% | few      |
| Accessory olfactory bulb, mitral layer                  | AOBmi   | 0.02% | few      |
| Anterior olfactory nucleus                              | AON     | 0.09% | few      |
| Cortical amygdalar area, anterior part                  | COAa    | 0.11% | moderate |
| Cortical amygdalar area, posterior part                 | COAp    | 0.11% | moderate |
| Dorsal peduncular area                                  | DP      | 0.31% | moderate |
| Main olfactory bulb                                     | MOB     | 0.03% | few      |
| Nucleus of the lateral olfactory tract, molecular layer | NLOT1   | 0.13% | moderate |
| Nucleus of the lateral olfactory tract, layer 3         | NLOT3   | 0.15% | moderate |
| Piriform-amygdalar area                                 | PAA     | 0.08% | few      |
| Piriform area                                           | PIR     | 0.06% | few      |
| Postpiriform transition area                            | TR      | 0.14% | moderate |
| Taenia tecta                                            | TT      | 0.27% | moderate |
| undefined part of the Olfactory areas                   | OLF_0   | 0.10% | moderate |
| <b>Hippocampal formation</b>                            |         |       |          |
| Field CA1                                               | CA1     | 0.02% | few      |
| Field CA2                                               | CA2     | 0.02% | few      |
| Field CA3                                               | CA3     | 0.02% | few      |
| Dentate gyrus, molecular layer                          | DG-mo   | 0.01% | few      |
| Dentate gyrus, polymorph layer                          | DG-po   | 0.06% | few      |
| Dentate gyrus, granule cell layer                       | DG-sg   | 0.05% | few      |
| Entorhinal area, lateral part                           | ENTI    | 0.09% | few      |
| Entorhinal area, medial part, dorsal zone               | ENTm    | 0.09% | few      |
| Entorhinal area, medial part, ventral zone              | ENTmv   | 0.18% | moderate |
| Fasciola cinerea                                        | FC      | 0.09% | few      |
| Induseum griseum                                        | IG      | 0.29% | moderate |
| Parasubiculum                                           | PAR     | 0.10% | moderate |
| Postsubiculum                                           | POST    | 0.08% | few      |
| Presubiculum                                            | PRE     | 0.07% | few      |
| Subiculum                                               | SUB     | 0.07% | few      |
| undefined part of the Hippocampal formation             | HPF_0   | 0.08% | few      |
| <b>Cortical subplate</b>                                |         |       |          |
| Basolateral amygdalar nucleus, anterior part            | BLAa    | 0.08% | few      |
| Basolateral amygdalar nucleus, posterior part           | BLAp    | 0.07% | few      |
| Basolateral amygdalar nucleus, ventral part             | BLAv    | 0.10% | moderate |
| Basomedial amygdalar nucleus                            | BMA     | 0.15% | moderate |
| Clastrum                                                | CLA     | 0.11% | moderate |
| Endopiriform nucleus, dorsal part                       | EPd     | 0.11% | moderate |
| Endopiriform nucleus, ventral part                      | EPv     | 0.12% | moderate |
| Posterior amygdalar nucleus                             | PA      | 0.24% | moderate |
| Lateral amygdalar nucleus                               | LA      | 0.06% | few      |
| undefined part of the Cortical subplate                 | CTXsp_0 | 0.12% | moderate |
| <b>Cerebral nuclei</b>                                  |         |       |          |
| <b>Striatum</b>                                         |         |       |          |
| Anterior amygdalar area                                 | AAA     | 0.26% | moderate |
| Nucleus accumbens                                       | ACB     | 0.26% | moderate |
| Bed nucleus of the accessory olfactory tract            | BA      | 0.27% | moderate |
| Central amygdalar nucleus                               | CEA     | 0.33% | moderate |
| Caudoputamen                                            | CP      | 0.07% | few      |
| Fundus of striatum                                      | FS      | 0.23% | moderate |

|                                                           |        |       |          |
|-----------------------------------------------------------|--------|-------|----------|
| Intercalated amygdalar nucleus                            | IA     | 0.18% | moderate |
| Lateral septal nucleus, caudal (caudodorsal) part         | LSc    | 0.14% | moderate |
| Lateral septal nucleus, rostral (rostroventral) part      | LSr    | 0.51% | dense    |
| Lateral septal nucleus, ventral part                      | LSv    | 0.42% | moderate |
| Medial amygdalar nucleus                                  | MEA    | 0.23% | moderate |
| Olfactory tubercle                                        | OT     | 0.21% | moderate |
| undefined part of the Striatum                            | STR_0  | 0.27% | moderate |
| undefined part of the Striatum-like amygdalar nuclei      | sAMY_0 | 0.19% | moderate |
| <b>Pallidum</b>                                           |        |       |          |
| Bed nucleus of the anterior commissure                    | BAC    | 0.31% | moderate |
| Bed nuclei of the stria terminalis                        | BST    | 0.52% | dense    |
| Globus pallidus, external segment                         | GPe    | 0.11% | moderate |
| Globus pallidus, internal segment                         | GPi    | 0.14% | moderate |
| Magnocellular nucleus                                     | MA     | 0.45% | moderate |
| Medial septal nucleus                                     | MS     | 0.83% | dense    |
| Substantia innominata                                     | SI     | 0.50% | dense    |
| Triangular nucleus of septum                              | TRS    | 0.22% | moderate |
| Diagonal band nucleus                                     | NDB    | 1.19% | dense    |
| undefined part of the Pallidum                            | PAL_0  | 0.45% | moderate |
| <b>Brain stem</b>                                         |        |       |          |
| <b>Interbrain</b>                                         |        |       |          |
| <b>Thalamus</b>                                           |        |       |          |
| Anterodorsal nucleus                                      | AD     | 1.21% | dense    |
| Anteromedial nucleus                                      | AM     | 0.44% | moderate |
| Anteroventral nucleus of thalamus                         | AV     | 0.43% | moderate |
| Central lateral nucleus of the thalamus                   | CL     | 0.08% | few      |
| Central medial nucleus of the thalamus                    | CM     | 0.27% | moderate |
| Interanterodorsal nucleus of the thalamus                 | IAD    | 0.39% | moderate |
| Interanteromedial nucleus of the thalamus                 | IAM    | 0.32% | moderate |
| Intergeniculate leaflet of the lateral geniculate complex | IGL    | 0.07% | few      |
| Intermediodorsal nucleus of the thalamus                  | IMD    | 0.35% | moderate |
| Lateral dorsal nucleus of thalamus                        | LD     | 0.07% | few      |
| Dorsal part of the lateral geniculate complex             | LGd    | 0.06% | few      |
| Ventral part of the lateral geniculate complex            | LGv    | 0.10% | moderate |
| Lateral habenula                                          | LH     | 0.19% | moderate |
| Lateral posterior nucleus of the thalamus                 | LP     | 0.08% | few      |
| Mediodorsal nucleus of thalamus                           | MD     | 0.15% | moderate |
| Medial geniculate complex                                 | MG     | 0.13% | moderate |
| Medial habenula                                           | MH     | 0.09% | few      |
| Paracentral nucleus                                       | PCN    | 0.10% | moderate |
| Parafascicular nucleus                                    | PF     | 0.21% | moderate |
| Posterior complex of the thalamus                         | PO     | 0.05% | few      |
| Posterior limiting nucleus of the thalamus                | POL    | 0.17% | moderate |
| Peripeduncular nucleus                                    | PP     | 0.50% | dense    |
| Parataenial nucleus                                       | PT     | 0.23% | moderate |
| Paraventricular nucleus of the thalamus                   | PVT    | 0.32% | moderate |
| Nucleus of reuniens                                       | RE     | 0.49% | moderate |
| Rhomboid nucleus                                          | RH     | 0.37% | moderate |
| Reticular nucleus of the thalamus                         | RT     | 0.06% | few      |
| Supragenulate nucleus                                     | SGN    | 0.09% | few      |

|                                                                    |       |       |          |
|--------------------------------------------------------------------|-------|-------|----------|
| Submedial nucleus of the thalamus                                  | SMT   | 0.25% | moderate |
| Subparafascicular area                                             | SPA   | 0.51% | dense    |
| Subparafascicular nucleus, magnocellular part                      | SPFm  | 0.50% | dense    |
| Subparafascicular nucleus, parvicellular part                      | SPFp  | 0.30% | moderate |
| Subgeniculate nucleus                                              | SubG  | 0.05% | few      |
| Ventral anterior-lateral complex of the thalamus                   | VAL   | 0.05% | few      |
| Ventral medial nucleus of the thalamus                             | VM    | 0.20% | moderate |
| Ventral posterolateral nucleus of the thalamus                     | VPL   | 0.02% | few      |
| Ventral posterolateral nucleus of the thalamus, parvicellular part | VPLpc | 0.19% | moderate |
| Ventral posteromedial nucleus of the thalamus                      | VPM   | 0.04% | few      |
| Ventral posteromedial nucleus of the thalamus, parvicellular part  | VPMpc | 0.29% | moderate |
| Perireunensis nucleus                                              | PR    | 0.42% | moderate |
| undefined part of the Thalamus                                     | TH_0  | 0.22% | moderate |

### Hypothalamus

|                                                           |      |       |          |
|-----------------------------------------------------------|------|-------|----------|
| Anterodorsal preoptic nucleus                             | ADP  | 0.68% | dense    |
| Anterior hypothalamic nucleus                             | AHN  | 0.61% | dense    |
| Arcuate hypothalamic nucleus                              | ARH  | 0.47% | moderate |
| Accessory supraoptic group                                | ASO  | 0.46% | moderate |
| Anteroventral preoptic nucleus                            | AVP  | 1.58% | dense    |
| Anteroventral periventricular nucleus                     | AVPV | 0.76% | dense    |
| Fields of Forel                                           | FF   | 0.27% | moderate |
| Lateral preoptic area                                     | LPO  | 0.93% | dense    |
| Median preoptic nucleus                                   | MEPO | 1.04% | dense    |
| Medial preoptic nucleus                                   | MPN  | 0.70% | dense    |
| Medial preoptic area                                      | MPO  | 1.07% | dense    |
| Vascular organ of the lamina terminalis                   | OV   | 0.44% | moderate |
| Posterodorsal preoptic nucleus                            | PD   | 0.67% | dense    |
| Parastrial nucleus                                        | PS   | 1.28% | dense    |
| Periventricular hypothalamic nucleus, anterior part       | PVa  | 0.29% | moderate |
| Paraventricular hypothalamic nucleus                      | PVH  | 0.54% | dense    |
| Paraventricular hypothalamic nucleus, descending division | PVHd | 0.38% | moderate |
| Periventricular hypothalamic nucleus, preoptic part       | PVpo | 0.64% | dense    |
| Retrochiasmatic area                                      | RCH  | 1.21% | dense    |
| Subparaventricular zone                                   | SBPV | 0.67% | dense    |
| Suprachiasmatic nucleus                                   | SCH  | 0.80% | dense    |
| Subfornical organ                                         | SFO  | 0.00% | few      |
| Supraoptic nucleus                                        | SO   | 0.87% | dense    |
| Subthalamic nucleus                                       | STN  | 0.25% | moderate |
| Ventrolateral preoptic nucleus                            | VLPO | 1.19% | dense    |
| undefined part of the Zona incerta                        | ZI_0 | 0.21% | moderate |

### Midbrain

#### sensory related

|                                                    |      |       |          |
|----------------------------------------------------|------|-------|----------|
| Inferior colliculus                                | IC   | 0.05% | few      |
| Midbrain trigeminal nucleus                        | MEV  | 0.13% | moderate |
| Nucleus of the brachium of the inferior colliculus | NB   | 0.23% | moderate |
| Parabigeminal nucleus                              | PBG  | 0.08% | few      |
| Nucleus sagulum                                    | SAG  | 0.07% | few      |
| Superior colliculus, optic layer                   | SCop | 0.19% | moderate |
| Superior colliculus, superficial gray layer        | SCsg | 0.17% | moderate |

#### motor related

|                                                                                   |        |       |          |
|-----------------------------------------------------------------------------------|--------|-------|----------|
| Anterior pretectal nucleus                                                        | APN    | 0.10% | moderate |
| Anterior tegmental nucleus                                                        | AT     | 0.26% | moderate |
| Cuneiform nucleus                                                                 | CUN    | 0.08% | few      |
| Edinger-Westphal nucleus                                                          | EW     | 0.61% | dense    |
| Oculomotor nucleus                                                                | III    | 0.05% | few      |
| Interstitial nucleus of Cajal                                                     | INC    | 0.34% | moderate |
| Intermediate reticular nucleus                                                    | IRN    | 0.02% | few      |
| Inferior salivatory nucleus                                                       | ISN    | 0.05% | few      |
| Trochlear nucleus                                                                 | IV     | 0.16% | moderate |
| Lateral terminal nucleus of the accessory optic tract                             | LT     | 0.33% | moderate |
| Medial pretectal area                                                             | MPT    | 0.22% | moderate |
| Midbrain reticular nucleus                                                        | MRN    | 0.26% | moderate |
| Nucleus of Darkschewitsch                                                         | ND     | 0.23% | moderate |
| Nucleus of the optic tract                                                        | NOT    | 0.12% | moderate |
| Nucleus of the posterior commissure                                               | NPC    | 0.19% | moderate |
| Olivary pretectal nucleus                                                         | OP     | 0.20% | moderate |
| Posterior pretectal nucleus                                                       | PPT    | 0.17% | moderate |
| Precommissural nucleus                                                            | PRC    | 0.25% | moderate |
| Red nucleus                                                                       | RN     | 0.14% | moderate |
| Midbrain reticular nucleus, retrorubral area                                      | RR     | 0.29% | moderate |
| Superior colliculus, motor related, deep gray layer                               | SCdg   | 0.11% | moderate |
| Superior colliculus, motor related, deep white layer                              | SCdw   | 0.12% | moderate |
| Superior colliculus, motor related, intermediate gray layer, sublayer a           | SCig-a | 0.23% | moderate |
| Superior colliculus, motor related, intermediate gray layer, sublayer b           | SCig-b | 0.19% | moderate |
| Superior colliculus, motor related, intermediate gray layer, sublayer c           | SCig-c | 0.20% | moderate |
| Superior colliculus, motor related, intermediate white layer                      | SCiw   | 0.11% | moderate |
| Substantia nigra, reticular part                                                  | SNr    | 0.16% | moderate |
| Ventral tegmental area                                                            | VTA    | 0.81% | dense    |
| Ventral tegmental nucleus                                                         | VTN    | 0.32% | moderate |
| undefined part of the Superior colliculus, motor related, intermediate gray layer | SCig_0 | 0.16% | moderate |
| undefined part of the Periaqueductal gray                                         | PAG_0  | 0.24% | moderate |
| <b>behavioral state related</b>                                                   |        |       |          |
| Central linear nucleus raphe                                                      | CLI    | 0.49% | moderate |
| Dorsal nucleus raphe                                                              | DR     | 0.38% | moderate |
| Pedunculopontine nucleus                                                          | PPN    | 0.11% | moderate |
| Rostral linear nucleus raphe                                                      | RL     | 1.11% | dense    |
| Substantia nigra, compact part                                                    | SNC    | 0.36% | moderate |
| undefined part of the Midbrain                                                    | MB_0   | 0.20% | moderate |
| <b>Hindbrain</b>                                                                  |        |       |          |
| <b>Pons</b>                                                                       |        |       |          |
| Superior central nucleus raphe                                                    | CS     | 0.14% | moderate |
| Dorsal tegmental nucleus                                                          | DTN    | 0.33% | moderate |
| Nucleus of the lateral lemniscus                                                  | NLL    | 0.04% | few      |
| Parabrachial nucleus                                                              | PB     | 0.11% | moderate |
| Pontine central gray                                                              | PCG    | 0.11% | moderate |
| Pontine gray                                                                      | PG     | 0.05% | few      |
| Superior olivary complex, periolivary region                                      | POR    | 0.01% | few      |
| Pontine reticular nucleus, caudal part                                            | PRNc   | 0.03% | few      |
| Pontine reticular nucleus                                                         | PRNr   | 0.06% | few      |

|                                                     |       |       |          |
|-----------------------------------------------------|-------|-------|----------|
| Principal sensory nucleus of the trigeminal         | PSV   | 0.01% | few      |
| Nucleus raphe pontis                                | RPO   | 0.08% | few      |
| Supragenua nucleus                                  | SG    | 0.06% | few      |
| Subceruleus nucleus                                 | SLC   | 0.08% | few      |
| Sublaterodorsal nucleus                             | SLD   | 0.09% | few      |
| Superior olivary complex, lateral part              | SOCI  | 0.01% | few      |
| Superior olivary complex, medial part               | SOCm  | 0.01% | few      |
| Supratrigeminal nucleus                             | SUT   | 0.04% | few      |
| Tegmental reticular nucleus                         | TRN   | 0.07% | few      |
| Motor nucleus of trigeminal                         | V     | 0.02% | few      |
| Barrington's nucleus                                | B     | 0.14% | moderate |
| Locus ceruleus                                      | LC    | 0.09% | few      |
| Laterodorsal tegmental nucleus                      | LDT   | 0.10% | moderate |
| Nucleus incertus                                    | NI    | 0.10% | moderate |
| undefined part of the Pons                          | P_0   | 0.05% | few      |
| <b>Medulla</b>                                      |       |       |          |
| Accessory facial motor nucleus                      | ACVII | 0.03% | few      |
| Nucleus ambiguus, dorsal division                   | AMBd  | 0.05% | few      |
| Nucleus ambiguus, ventral division                  | AMBv  | 0.01% | few      |
| Area postrema                                       | AP    | 0.00% | few      |
| Cuneate nucleus                                     | CU    | 0.01% | few      |
| Dorsal cochlear nucleus                             | DCO   | 0.01% | few      |
| Dorsal motor nucleus of the vagus nerve             | DMX   | 0.02% | few      |
| External cuneate nucleus                            | ECU   | 0.01% | few      |
| Gracile nucleus                                     | GR    | 0.00% | few      |
| Gigantocellular reticular nucleus                   | GRN   | 0.01% | few      |
| Infracerebellar nucleus                             | ICB   | 0.01% | few      |
| Medullary reticular nucleus, dorsal part            | MDRNd | 0.02% | few      |
| Medullary reticular nucleus, ventral part           | MDRNv | 0.01% | few      |
| Nucleus of the trapezoid body                       | NTB   | 0.03% | few      |
| Nucleus of the solitary tract                       | NTS   | 0.02% | few      |
| Parvicellular reticular nucleus                     | PARN  | 0.03% | few      |
| Parasolitary nucleus                                | PAS   | 0.01% | few      |
| Paragigantocellular reticular nucleus, dorsal part  | PGRNd | 0.01% | few      |
| Paragigantocellular reticular nucleus, lateral part | PGRNI | 0.03% | few      |
| Parapyramidal nucleus                               | PPY   | 0.03% | few      |
| Nucleus prepositus                                  | PRP   | 0.01% | few      |
| Nucleus raphe magnus                                | RM    | 0.07% | few      |
| Nucleus raphe obscurus                              | RO    | 0.04% | few      |
| Nucleus raphe pallidus                              | RPA   | 0.02% | few      |
| Spinal vestibular nucleus                           | SPIV  | 0.01% | few      |
| Spinal nucleus of the trigeminal, caudal part       | SPVC  | 0.01% | few      |
| Spinal nucleus of the trigeminal, interpolar part   | SPVI  | 0.01% | few      |
| Spinal nucleus of the trigeminal, oral part         | SPVO  | 0.01% | few      |
| Superior vestibular nucleus                         | SUV   | 0.01% | few      |
| Ventral cochlear nucleus                            | VCO   | 0.00% | few      |
| Abducens nucleus                                    | VI    | 0.01% | few      |
| Facial motor nucleus                                | VII   | 0.02% | few      |
| Nucleus x                                           | x     | 0.02% | few      |
| Hypoglossal nucleus                                 | XII   | 0.04% | few      |

|                                              |      |       |          |
|----------------------------------------------|------|-------|----------|
| Nucleus y                                    | y    | 0.02% | few      |
| Inferior olivary complex                     | IO   | 0.05% | few      |
| Lateral vestibular nucleus                   | LAV  | 0.01% | few      |
| Linear nucleus of the medulla                | LIN  | 0.01% | few      |
| Lateral reticular nucleus                    | LRN  | 0.02% | few      |
| Magnocellular reticular nucleus              | MARN | 0.03% | few      |
| Medial vestibular nucleus                    | MV   | 0.01% | few      |
| Nucleus of Roller                            | NR   | 0.02% | few      |
| undefined part of the Medulla                | MY_0 | 0.02% | few      |
| <b>Cerebellum</b>                            |      |       |          |
| <b>Cerebellar cortex</b>                     |      |       |          |
| Central lobule                               | CENT | 0.00% | few      |
| Copula pyramidis                             | COPY | 0.00% | few      |
| Culmen                                       | CUL  | 0.00% | few      |
| Declive (VI)                                 | DEC  | 0.00% | few      |
| Flocculus                                    | FL   | 0.00% | few      |
| Folium-tuber vermis (VII)                    | FOTU | 0.00% | few      |
| Lingula (I)                                  | LING | 0.00% | few      |
| Nodulus (X)                                  | NOD  | 0.00% | few      |
| Paraflocculus                                | PFL  | 0.00% | few      |
| Paramedian lobule                            | PRM  | 0.00% | few      |
| Pyramus (VIII)                               | PYR  | 0.00% | few      |
| Simple lobule                                | SIM  | 0.00% | few      |
| Uvula (IX)                                   | UVU  | 0.00% | few      |
| Ansiform lobule                              | AN   | 0.00% | few      |
| <b>Cerebellar nuclei</b>                     |      |       |          |
| Dentate nucleus                              | DN   | 0.01% | few      |
| Fastigial nucleus                            | FN   | 0.00% | few      |
| Interposed nucleus                           | IP   | 0.01% | few      |
| undefined part of the Cerebellum             | CB_0 | 0.00% | few      |
| <b>fiber tracts</b>                          |      |       |          |
| <b>cranial nerves</b>                        |      |       |          |
| anterior commissure, olfactory limb          | aco  | 0.13% | moderate |
| brachium of the inferior colliculus          | bic  | 0.12% | moderate |
| inferior colliculus commissure               | cic  | 0.10% | moderate |
| cuneate fascicle                             | cuf  | 0.00% | few      |
| gracile fascicle                             | grf  | 0.00% | few      |
| trochlear nerve                              | IVn  | 0.23% | moderate |
| lateral lemniscus                            | ll   | 0.05% | few      |
| lateral olfactory tract, body                | lot  | 0.02% | few      |
| medial lemniscus                             | ml   | 0.18% | moderate |
| medial longitudinal fascicle                 | mlf  | 0.07% | few      |
| motor root of the trigeminal nerve           | moV  | 0.03% | few      |
| midbrain tract of the trigeminal nerve       | mtV  | 0.10% | moderate |
| optic chiasm                                 | och  | 0.25% | moderate |
| olfactory nerve layer of main olfactory bulb | onl  | 0.01% | few      |
| optic tract                                  | opt  | 0.35% | moderate |
| posterior commissure                         | pc   | 0.17% | moderate |
| spinal tract of the trigeminal nerve         | sptV | 0.01% | few      |
| trapezoid body                               | tb   | 0.02% | few      |

|                                           |                |       |          |
|-------------------------------------------|----------------|-------|----------|
| solitary tract                            | ts             | 0.03% | few      |
| facial nerve                              | VIIIn          | 0.01% | few      |
| vomeronasal nerve                         | von            | 0.01% | few      |
| vestibular nerve                          | vVIIIIn        | 0.00% | few      |
| undefined part of the optic nerve         | IIn_0          | 0.03% | few      |
| <b>cerebellum related fiber tracts</b>    |                |       |          |
| arbor vitae                               | arb            | 0.01% | few      |
| inferior cerebellar peduncle              | icp            | 0.01% | few      |
| middle cerebellar peduncle                | mcp            | 0.02% | few      |
| superior cerebelar peduncles              | scp            | 0.08% | few      |
| <b>lateral forebrain bundle system</b>    |                |       |          |
| corpus callosum                           | cc             | 0.09% | few      |
| cerebal peduncle                          | cpd            | 0.11% | moderate |
| external medullary lamina of the thalamus | em             | 0.03% | few      |
| internal medullary lamina of the thalamus | im             | 0.24% | moderate |
| internal capsule                          | int            | 0.08% | few      |
| pyramid                                   | py             | 0.03% | few      |
| undefined part of the corticospinal tract | cst_0          | 0.04% | few      |
| <b>extrapyramidal fiber systems</b>       |                |       |          |
| doral tegmental decussation               | dtd            | 0.60% | dense    |
| ventral tegmental decussation             | vtd            | 0.64% | dense    |
| undefined part of the tectospinal pathway | tsp_0          | 0.13% | moderate |
| undefined part of the rubrospinal tract   | rust_0         | 0.08% | few      |
| <b>medial forebrain bundle system</b>     |                |       |          |
| anterior commissure, temporal limb        | act            | 0.32% | moderate |
| alveus                                    | alv            | 0.07% | few      |
| amygdalar capsule                         | amc            | 0.08% | few      |
| cingulum bundle                           | cing           | 0.10% | moderate |
| dorsal fornix                             | df             | 0.59% | dense    |
| dorsal hippocampal commissure             | dhc            | 0.09% | few      |
| fimbria                                   | fi             | 0.08% | few      |
| fasciculus retroflexus                    | fr             | 0.33% | moderate |
| columns of the fornix                     | fx             | 0.64% | dense    |
| habenular commissure                      | hbc            | 0.08% | few      |
| mammillothalamic tract                    | mtt            | 1.39% | dense    |
| stria medullaris                          | sm             | 0.19% | moderate |
| stria terminalis                          | st             | 0.11% | moderate |
| ventral hippocampal commissure            | vhc            | 0.04% | few      |
| undefined part of the fiber tracts        | fiber tracts_0 | 0.08% | few      |
| <b>Ventricular system</b>                 |                |       |          |
| cerebral aqueduct                         | AQ             | 0.00% | few      |
| central canal, spinal cord/medulla        | c              | 0.03% | few      |
| third ventricle                           | V3             | 0.03% | few      |
| lateral recess                            | V4r            | 0.00% | few      |
| lateral ventricle                         | VL             | 0.01% | few      |
| undefined part of the ventricular systems | VS_0           | 0.06% | few      |
| undefined part of the fourth ventricle    | V4_0           | 0.00% | few      |

Table S4. Histaminergic fiber density significantly different from previous studies.

|                                              | Our study            | Naoyuki I., et al., (0-5) | Panula P., et al., (1-4) |
|----------------------------------------------|----------------------|---------------------------|--------------------------|
| molecular layer of the Dentate gyrus (DG-mo) | 0.01%                | 1                         | 2                        |
| other parts of the Dentate gyrus             | 0.05%                | 1                         | 2                        |
| the Fimbria of the hippocampus (fi)          | 0.08%                | 2-3                       | 3                        |
| the Basolateral amygdalar nucleus (BLA)      | 0.08%                | 3                         | 1-2                      |
| the Central amygdalar nucleus (CeA)          | 0.33%                | 4                         | 1-2                      |
| the Caudoputamen (CP)                        | 0.07%                | 2-3                       | 1-2                      |
| the Anterodorsal nucleus (AD)                | 1.21%                | 3-4                       | 2                        |
| the Lateral dorsal nucleus of thalamus (LD)  | 0.07%                | 3                         | N/A                      |
| the Mediodorsal nucleus of thalamus (MD)     | 0.15%                | 3-4                       | N/A                      |
| the Zona incerta (ZI)                        | 0.21%                | 1                         | N/A                      |
| the Substantia nigra (SN)                    | SNc:0.36%, SNr:0.16% | 1                         | 3                        |
| the Dorsal nucleus raphe (DR)                | 0.38%                | 0                         | 2                        |

Density grade in the study of Naoyuki I., et al.: 0 no fluorescence, 1 very low density, 2 low density, 3 medium density, 4 high density, 5 very high density.

Density grade in the study of Panula P., et al.: 1 very low density, 2 low density, 3 moderate density, 4 high density.



## SI References

1. Gong H, *et al.* (2016) High-throughput dual-colour precision imaging for brain-wide connectome with cytoarchitectonic landmarks at the cellular level. *Nat Commun* 7:12142.
